# Supplementary material
Source: publisher site journal article supplement (http://www.spandidos-publications.com/6212/downloadSupplementary)
Supplement: Supplementary file 1 [file downloadSupplementary]

## Sheet: Sheet1
Table SIII. Differentially expressed genes of GSE26887.
ID	logFC	AveExpr	t	P-value	adjusted.P-value	B
March2	0.540819	7.33246	3.58259	0.001893	0.023215	-1.36057
March8	0.51157	8.3757	3.78247	0.001191	0.017645	-0.92451
A4GALT	-0.61295	7.58124	-4.88487	9.28e-05	0.004684	1.49714
AAK1	0.520969	9.45402	4.38233	0.000296	0.007984	0.395455
AASS	-0.61553	8.55945	-3.19406	0.004612	0.039007	-2.19461
ABCA10	1.1359	6.53529	3.63222	0.001687	0.021562	-1.25264
ABCA8	1.0962	8.24025	4.02433	0.000679	0.012551	-0.3933
ABCA9	1.2002	8.06673	4.46774	0.000243	0.007326	0.583454
ABCB4	0.706847	6.40215	4.93927	8.19e-05	0.004431	1.6155
ABCC3	-0.50002	5.49954	-4.24095	0.000411	0.009397	0.083942
ABCC9	0.748021	9.76275	3.90732	0.000892	0.014718	-0.65064
ABCD2	0.68137	7.41588	3.49649	0.002308	0.026082	-1.54722
ABCG1	-0.56183	6.54683	-4.11722	0.000547	0.011203	-0.18873
ABHD10	0.77129	7.68736	3.53144	0.00213	0.02492	-1.47156
ABHD11	0.573439	7.72221	3.49122	0.002337	0.02633	-1.55861
ABHD2	-0.73061	9.02311	-3.04526	0.006456	0.048441	-2.50711
ABHD4	0.582458	7.81323	5.08359	5.9e-05	0.003675	1.92837
ABHD5	-1.20297	8.84364	-4.14911	0.000508	0.010696	-0.11845
ABRA	-1.23717	6.81525	-4.33899	0.000327	0.008542	0.299983
ACAA2	0.590212	7.74074	5.03942	6.52e-05	0.003861	1.8328
ACAD10	0.635047	6.87997	3.75652	0.001265	0.018319	-0.9813
ACADM	0.713833	10.948	3.20592	0.004489	0.038357	-2.1695
ACADSB	0.84722	8.1598	4.42949	0.000265	0.007537	0.499275
ACE2	0.912822	7.93145	3.1286	0.00535	0.042904	-2.33265
ACKR4	0.807502	5.58511	3.62104	0.001732	0.021822	-1.27698
ACLY	-0.6746	7.71139	-4.4273	0.000266	0.007537	0.494466
ACOX2	0.6732	7.43279	3.72205	0.001371	0.019195	-1.05668
ACSF2	0.511806	6.3976	3.69934	0.001445	0.019756	-1.10628
ACSL4	-0.83824	7.51983	-3.5318	0.002128	0.02492	-1.47078
ACSM3	0.826034	5.6457	3.10353	0.005662	0.044625	-2.38528
ACTA2	1.11769	10.4019	4.45137	0.000252	0.007409	0.547435
ACTB	-0.58957	11.7039	-3.32192	0.003446	0.033025	-1.92268
ACTG1	-0.63083	10.813	-3.84615	0.001028	0.016132	-0.78494
ADAL	0.673895	8.02046	3.28158	0.003779	0.034725	-2.00877
ADAM12	-0.75215	5.52142	-3.04062	0.006524	0.048749	-2.51676
ADAM19	-1.0258	8.01922	-3.66427	0.001567	0.020664	-1.1828
ADAM32	0.710862	6.46017	3.50786	0.002249	0.025744	-1.52263
ADAMTS15	-0.93235	6.54726	-5.73085	1.38e-05	0.002029	3.3062
ADAMTS4	-1.11585	6.40285	-4.88513	9.27e-05	0.004684	1.49769
ADAMTS9	-1.1899	8.1033	-3.77962	0.001199	0.017733	-0.93075
ADAMTSL1	0.660289	5.79744	3.2985	0.003636	0.034069	-1.97269
ADGRE2	-0.60666	5.59692	-4.48339	0.000234	0.007282	0.617881
ADGRE5	-0.59214	8.11772	-4.38765	0.000292	0.007939	0.407158
ADGRG1	-0.63745	7.61851	-3.67141	0.001541	0.020459	-1.16723
ADRA1B	-0.73593	6.75497	-4.56453	0.000194	0.006677	0.796227
ADSL	-0.52109	7.92423	-3.78756	0.001177	0.017513	-0.91337
AEN	-0.62453	6.51521	-4.26615	0.000387	0.009175	0.139496
AFF3	0.571028	6.69196	4.31937	0.000342	0.00867	0.256752
AGO2	-0.64809	7.68856	-3.46111	0.002504	0.027422	-1.62364
AGTPBP1	0.513474	8.16575	3.69319	0.001465	0.019926	-1.11972
AGTRAP	-0.50904	7.65666	-3.99153	0.000733	0.013159	-0.46549
AK3	0.512734	9.78108	4.23007	0.000421	0.009485	0.059978
AKAP1	0.691545	9.30652	3.41452	0.002787	0.029287	-1.72405
AKAP11	0.550479	7.83399	5.0859	5.86e-05	0.003675	1.93337
AKT3	0.558515	7.15475	3.66564	0.001562	0.020625	-1.17982
ALDH1A1	0.912238	6.81564	4.13602	0.000524	0.010834	-0.14731
ALDH1A3	-0.50154	6.01582	-5.62143	1.76e-05	0.002242	3.0766
ALDH1B1	-0.61397	8.31255	-3.53968	0.00209	0.02472	-1.45371
ALDH5A1	0.60084	6.88933	3.33509	0.003344	0.032386	-1.89449
ALG3	-0.69981	8.51493	-3.76376	0.001244	0.018105	-0.96547
ALOX5	-0.80793	6.65162	-5.40254	2.87e-05	0.002654	2.61302
ALPL	-0.5799	6.94937	-4.27782	0.000377	0.009079	0.165213
ALS2CR12	0.900475	7.39349	6.27796	4.2e-06	0.001262	4.43087
AMD1	-0.54442	8.20286	-3.15752	0.005011	0.041004	-2.27177
AMOT	0.633819	6.16532	4.6214	0.00017	0.006216	0.921068
AMPD2	-0.60524	6.21018	-3.89536	0.000917	0.015045	-0.67691
AMT	0.650462	7.23086	3.36344	0.003134	0.031331	-1.83376
AMY2A	1.2896	7.64686	8.54894	4.57e-08	0.00028	8.62361
AMY2B	0.858678	7.54413	3.3437	0.003279	0.032085	-1.87608
ANK2	0.881675	9.60077	5.38654	2.97e-05	0.002675	2.57893
ANKH	0.553216	9.0665	3.92011	0.000866	0.014549	-0.62254
ANKMY2	0.594595	7.67371	4.21976	0.000431	0.009556	0.037256
ANKRA2	0.535831	5.49303	3.45602	0.002534	0.02761	-1.63463
ANKRD13A	-1.37163	7.8771	-4.1147	0.000551	0.011246	-0.19429
ANKRD2	-1.91308	8.62245	-6.61104	2.07e-06	0.000998	5.09501
ANKRD20A12P	1.53852	7.12767	5.31614	3.48e-05	0.00285	2.42856
ANKRD20A9P	0.579005	5.21762	4.59521	0.000181	0.006441	0.863603
ANKRD29	0.877791	6.54586	4.41429	0.000275	0.007684	0.465829
ANKRD30BP2	0.924923	5.55933	4.54358	0.000204	0.00683	0.750202
ANKRD36	0.575808	7.06491	3.36318	0.003136	0.031331	-1.83434
ANKRD36B	0.730617	7.44273	5.25406	4.01e-05	0.003034	2.29556
ANKRD36C	0.580745	7.561	3.83573	0.001053	0.016373	-0.80778
ANO1	0.581303	7.57177	3.10352	0.005662	0.044625	-2.38531
ANO5	0.972762	8.93074	4.69604	0.000143	0.005643	1.08467
ANOS1	0.692412	6.45029	3.04458	0.006466	0.048479	-2.50852
ANPEP	-0.91125	6.03	-4.30619	0.000353	0.008857	0.227727
ANXA2	-0.67836	8.53482	-3.36626	0.003113	0.031238	-1.82773
ANXA2P1	-0.60616	6.53146	-4.22153	0.00043	0.009539	0.041152
ANXA2P2	-0.60979	10.1791	-3.14916	0.005106	0.041583	-2.28939
ANXA5	-0.64074	10.2497	-3.10381	0.005658	0.044625	-2.38471
AP3M2	0.890182	7.33997	4.93268	8.32e-05	0.004467	1.60116
APBB2	0.602153	8.82099	4.62703	0.000168	0.006198	0.93342
APBB3	0.585199	7.51701	4.08654	0.000588	0.011621	-0.25632
APH1B	0.587529	6.17073	3.07517	0.006036	0.046517	-2.44468
APLF	0.619248	6.75205	3.83703	0.00105	0.016337	-0.80493
APOBEC3C	0.55185	7.96047	4.26867	0.000385	0.009165	0.145029
APOO	0.508804	10.0405	3.48963	0.002345	0.026354	-1.56206
AQP3	-0.59599	6.8247	-4.30817	0.000351	0.008854	0.232073
AQP9	-1.21337	5.19583	-4.28705	0.000369	0.008971	0.185534
ARAF	-0.52744	8.24496	-5.25236	4.02e-05	0.003034	2.29192
AREG	-0.95384	5.66612	-3.29852	0.003635	0.034069	-1.97264
ARG2	-1.05472	5.41461	-4.82085	0.000107	0.004983	1.35756
ARHGAP1	0.532621	10.2094	3.7376	0.001322	0.018829	-1.0227
ARHGAP15	0.552213	5.8558	4.2647	0.000389	0.009176	0.136287
ARHGAP23	-0.54368	7.5557	-4.7802	0.000118	0.005132	1.26878
ARHGAP28	0.662066	5.64811	3.91487	0.000876	0.014622	-0.63404
ARHGDIA	-0.98169	8.0176	-7.98782	1.31e-07	0.00028	7.66147
ARHGEF28	0.609868	5.68614	3.45651	0.002531	0.027593	-1.63357
ARHGEF6	0.641723	8.62909	4.02364	0.00068	0.012556	-0.39482
ARHGEF9	0.699264	8.50604	3.93384	0.000838	0.014247	-0.59236
ARL15	0.730699	7.72314	4.29401	0.000363	0.008904	0.200873
ARMC8	-0.64769	7.51001	-3.3802	0.003016	0.030686	-1.79782
ARPC1B	-1.07141	8.30798	-5.90776	9.36e-06	0.001683	3.67425
ARRB2	-0.51834	7.71082	-3.23161	0.004235	0.037018	-2.11505
ARRDC3	0.987587	8.60441	4.8194	0.000108	0.004983	1.35438
ART4	0.946554	6.18929	4.9236	8.49e-05	0.004496	1.58143
ARV1	0.678498	8.79686	3.97556	0.000761	0.0135	-0.50062
AS3MT	1.07927	8.58901	4.25137	0.000401	0.009267	0.106919
ASB1	-0.53457	7.76456	-3.30687	0.003567	0.033737	-1.95483
ASB11	1.34007	8.09371	4.5721	0.000191	0.006641	0.812845
ASB14	2.00696	8.26909	4.79526	0.000114	0.005089	1.30168
ASB15	1.48463	8.35492	3.62298	0.001724	0.021776	-1.27275
ASB4	0.649	5.22074	3.75108	0.001281	0.018463	-0.99321
ASPA	0.786984	4.69834	3.83303	0.00106	0.016401	-0.81372
ATG101	-0.51534	6.26309	-4.29187	0.000365	0.008917	0.196158
ATG14	0.663435	7.44867	4.77075	0.000121	0.005166	1.24813
ATM	0.552144	7.52345	4.63306	0.000166	0.006164	0.946645
ATP10D	0.642328	7.61803	4.28361	0.000372	0.009001	0.177964
ATP13A1	-0.54606	6.766	-4.00179	0.000716	0.013018	-0.44292
ATP1A1	-0.94727	10.5374	-5.03785	6.54e-05	0.003863	1.8294
ATP1A3	1.3042	11.1157	4.03049	0.00067	0.012453	-0.37974
ATP1B3	-0.78526	7.49864	-3.52666	0.002153	0.025141	-1.48191
ATP6V0C	-0.53495	10.0453	-5.07071	6.07e-05	0.003704	1.90053
ATP6V1F	-0.64138	9.87057	-3.90759	0.000891	0.014718	-0.65004
ATP8A1	0.873169	7.85991	4.88679	9.24e-05	0.004684	1.50131
ATXN7L3	-0.58771	5.58146	-3.25075	0.004054	0.036123	-2.07438
AVEN	-0.50241	7.26664	-3.88801	0.000933	0.015219	-0.69305
B4GAT1	0.520987	6.64752	3.80689	0.001126	0.017085	-0.87101
BAG3	-0.57901	8.63372	-4.53587	0.000207	0.006887	0.733252
BAG6	-0.60105	7.88952	-3.28762	0.003727	0.034392	-1.9959
BAGE3	1.75917	4.46215	4.53937	0.000206	0.006854	0.740945
BAZ2B	0.584435	7.95491	3.80446	0.001132	0.017143	-0.87634
BBS10	0.500756	6.40749	3.10649	0.005624	0.044483	-2.37907
BBS2	0.824867	8.04346	4.88965	9.18e-05	0.004679	1.50754
BCAS3	0.75758	7.9758	4.98467	7.39e-05	0.004201	1.71411
BCL2L1	-0.50677	8.78135	-3.25306	0.004033	0.036006	-2.06948
BCL2L11	0.667711	6.15349	4.08501	0.00059	0.011648	-0.25968
BCL3	-0.75882	7.65245	-4.81669	0.000108	0.004988	1.34847
BCL9L	-0.81871	7.57099	-6.2215	4.74e-06	0.001325	4.31671
BDH2	0.843723	6.47027	5.17432	4.8e-05	0.003323	2.12415
BEX1	0.973047	5.64424	3.35214	0.003216	0.031777	-1.858
BID	-0.5412	7.11265	-3.86238	0.00099	0.015737	-0.74931
BLZF1	0.557188	9.22436	5.60949	1.81e-05	0.002271	3.05146
BMP4	0.69165	6.03056	3.6765	0.001523	0.020337	-1.15613
BMP6	0.608963	6.94027	3.68728	0.001486	0.020119	-1.13261
BMP8A	-0.56105	5.76482	-3.09427	0.005781	0.045213	-2.4047
BOP1	-0.69737	7.27447	-4.94203	8.14e-05	0.004431	1.6215
BRINP3	0.832554	5.72266	3.08029	0.005966	0.046212	-2.43395
BRMS1	-0.64506	6.05499	-4.54807	0.000201	0.006785	0.760073
BTBD8	1.29002	5.46344	5.63748	1.7e-05	0.002196	3.11036
BTN3A1	0.63316	6.77547	3.71716	0.001386	0.019312	-1.06736
BVES	-0.54208	10.4177	-3.11118	0.005565	0.044101	-2.36924
BYSL	-0.76071	6.33183	-3.84723	0.001025	0.016116	-0.78256
C10orf54	-0.67749	7.01824	-6.25389	4.42e-06	0.001298	4.38226
C10orf71	1.34827	8.77104	4.32499	0.000338	0.008604	0.269141
C12orf75	0.78703	6.18952	3.9679	0.000775	0.013623	-0.51746
C19orf47	-0.51728	7.53474	-3.8853	0.000938	0.015261	-0.699
C1orf162	-0.68134	7.38805	-4.26261	0.00039	0.009176	0.131688
C1QTNF7	0.927205	5.24629	5.27261	3.84e-05	0.00297	2.33534
C1QTNF9	1.14154	6.24112	5.5916	1.88e-05	0.002271	3.01375
C1QTNF9B	0.961056	5.25422	3.37745	0.003035	0.030802	-1.80371
C2CD5	0.558504	7.97788	5.37693	3.04e-05	0.002682	2.55843
C3	-0.91336	9.01533	-3.0355	0.006599	0.049107	-2.52743
C3orf52	-0.73024	6.71774	-4.50647	0.000222	0.007156	0.668641
C4orf33	0.573181	6.2023	3.73259	0.001338	0.01896	-1.03363
C5AR1	-1.03102	6.60494	-5.39356	2.93e-05	0.002654	2.59388
C5orf56	0.578542	7.9658	4.98793	7.33e-05	0.004182	1.72118
C6	1.51124	7.97434	3.13885	0.005227	0.042258	-2.3111
C6orf203	0.585012	6.22821	3.71988	0.001378	0.019247	-1.06141
C6orf99	-0.55615	4.95482	-4.41212	0.000276	0.007706	0.461039
C7orf66	0.508118	5.03479	3.09483	0.005774	0.045202	-2.40353
C8orf44	0.642831	6.12714	3.31769	0.00348	0.03321	-1.93171
CADPS	0.926317	7.83647	3.22972	0.004253	0.0371	-2.11906
CALU	-0.80517	9.73909	-3.94683	0.000813	0.014037	-0.5638
CAPS2	0.774951	6.07379	4.86781	9.65e-05	0.004787	1.45996
CARF	0.909731	6.61846	7.54582	3.09e-07	0.000363	6.86945
CARM1	-0.51283	8.12824	-5.34511	3.26e-05	0.002789	2.49051
CARS	-0.50674	6.3256	-3.09795	0.005733	0.045066	-2.39698
CAV2	-0.59985	9.87496	-4.925	8.46e-05	0.004496	1.58446
CBX6	-0.67139	6.77431	-4.78281	0.000117	0.00512	1.27449
CBY1	0.782545	6.94197	5.74287	1.34e-05	0.002025	3.33133
CC2D2A	0.774483	5.89186	4.70625	0.00014	0.005555	1.10704
CCDC113	0.885583	5.9999	4.4697	0.000242	0.007326	0.587758
CCDC125	0.600929	6.35863	3.53699	0.002103	0.024776	-1.45954
CCDC141	1.08295	8.44715	3.7105	0.001408	0.019444	-1.08191
CCDC144CP	0.951079	7.56632	3.77878	0.001202	0.017755	-0.93259
CCDC168	0.60481	5.02245	5.25844	3.97e-05	0.003034	2.30495
CCDC171	0.634931	5.51132	4.22546	0.000426	0.009494	0.049799
CCDC28A	0.588767	5.9291	3.3143	0.003507	0.033383	-1.93895
CCDC3	0.941887	7.14192	4.28598	0.00037	0.008971	0.183193
CCDC86	-0.63774	6.80694	-3.63159	0.00169	0.021565	-1.25401
CCDC93	0.682211	8.14932	5.16154	4.94e-05	0.003383	2.09661
CCL11	-1.11905	6.89457	-5.25215	4.02e-05	0.003034	2.29145
CCL2	-1.65633	9.3355	-3.28801	0.003724	0.034392	-1.99508
CCL5	0.806042	6.77188	3.42257	0.002736	0.029	-1.70672
CCND1	0.61662	8.82703	5.10206	5.65e-05	0.003614	1.9683
CCNG2	0.668787	6.73304	5.74685	1.33e-05	0.002025	3.33966
CCR1	-1.03225	5.4308	-6.51512	2.54e-06	0.001055	4.90541
CCT2	-1.13931	7.54152	-4.24895	0.000403	0.009276	0.101578
CCT3	-0.55962	8.32102	-4.14566	0.000512	0.010715	-0.12605
CCT5	-0.75807	8.45425	-3.95312	0.000802	0.013869	-0.54998
CCT6A	-0.59093	7.96546	-4.42068	0.000271	0.007641	0.479898
CD163	-1.86285	6.61334	-7.89857	1.55e-07	0.00028	7.50398
CD180	-0.71194	5.14387	-3.33834	0.003319	0.032321	-1.88755
CD24	1.39719	5.36051	4.22542	0.000426	0.009494	0.049728
CD248	-0.81045	6.61473	-4.91099	8.74e-05	0.004568	1.554
CD274	-1.1749	6.76373	-3.65865	0.001587	0.020793	-1.19505
CD300E	-0.53516	6.25125	-4.83907	0.000103	0.00492	1.39732
CD36	0.632574	11.0719	3.55118	0.002035	0.02432	-1.42877
CD44	-1.25067	8.18538	-4.13833	0.000521	0.010809	-0.14221
CD59	-0.51373	10.7831	-4.59852	0.000179	0.006441	0.870861
CD63	-0.75349	9.02995	-4.06859	0.000613	0.011949	-0.29586
CD68	-1.10919	9.04448	-5.19988	4.53e-05	0.003269	2.17915
CDC37L1	-0.69373	7.51314	-3.06993	0.006107	0.04682	-2.45561
CDC42EP4	-0.54519	6.74688	-4.85126	0.0001	0.004887	1.4239
CDH23	0.52052	6.5872	4.00025	0.000718	0.013023	-0.44631
CDH6	0.925203	6.91461	4.70853	0.000139	0.005546	1.11203
CDK2	-0.62681	6.3693	-3.22641	0.004285	0.037323	-2.12608
CDKN1A	-1.34115	7.26471	-5.46652	2.48e-05	0.002514	2.74909
CDR1	0.890098	7.13948	5.70288	1.47e-05	0.002097	3.24764
CDS2	0.640023	9.81211	4.79219	0.000115	0.005091	1.29498
CDV3	-0.55201	9.67089	-4.32642	0.000337	0.008604	0.272284
CEBPB	-0.54971	7.88765	-3.53716	0.002102	0.024776	-1.45918
CEBPD	-1.03807	7.86995	-5.59306	1.87e-05	0.002271	3.01682
CENPC	0.816045	6.83597	6.45385	2.89e-06	0.001057	4.7836
CENPV	-1.15367	6.53228	-6.16211	5.38e-06	0.001408	4.19614
CEP126	0.826779	5.47098	3.84367	0.001034	0.016212	-0.79038
CEP170B	-0.53096	7.07562	-5.08483	5.88e-05	0.003675	1.93106
CEP192	0.592774	7.7196	4.2033	0.000448	0.009776	0.000962
CES1	0.8361	7.56474	4.78376	0.000117	0.00512	1.27657
CETN3	0.696182	5.04058	3.92215	0.000861	0.014493	-0.61806
CFAP61	1.37786	8.31128	8.13289	9.93e-08	0.00028	7.91483
CFAP70	0.584323	4.98413	4.26945	0.000384	0.009159	0.146765
CFL1	-0.53923	9.99629	-3.44204	0.002616	0.028176	-1.66477
CGNL1	0.633289	7.12764	4.80559	0.000111	0.005033	1.32425
CHAC1	-0.66614	6.30823	-3.68586	0.00149	0.020158	-1.13572
CHAC2	-0.67394	4.71102	-4.45153	0.000252	0.007409	0.547798
CHCHD2	-0.61965	7.84913	-3.27504	0.003836	0.034972	-2.02271
CHDH	-0.50521	5.56501	-3.04564	0.006451	0.048441	-2.50632
CHI3L1	-0.66983	5.13739	-4.16631	0.000488	0.010424	-0.08056
CHRDL2	-0.9085	5.90483	-5.01341	6.92e-05	0.004049	1.77644
CHRM2	0.551816	9.13855	3.27406	0.003844	0.034981	-2.02479
CHRNB1	-0.62296	7.06152	-3.70874	0.001414	0.019497	-1.08575
CILP	-1.29116	6.70692	-3.50828	0.002246	0.025733	-1.5217
CIR1	0.578721	5.58251	4.90835	8.79e-05	0.004568	1.54824
CITED2	-0.71357	9.31807	-4.37401	0.000302	0.008085	0.377123
CLASP2	0.54793	9.02785	4.3269	0.000336	0.008604	0.273357
CLCF1	-1.0377	7.06033	-4.40532	0.00028	0.007746	0.446072
CLIC4	-0.55452	11.09	-4.35418	0.000316	0.008365	0.333441
CLIP1	-0.53019	8.56726	-3.34981	0.003233	0.031853	-1.86299
CLK1	0.624594	8.28722	4.44178	0.000258	0.007432	0.526327
CLPTM1L	-0.69118	7.22265	-4.74125	0.000129	0.005358	1.18363
CLTB	-0.51152	9.43506	-3.40464	0.002851	0.029703	-1.74531
CLTCL1	0.590453	7.20664	3.50571	0.00226	0.025835	-1.52726
CLYBL	0.576055	7.07336	3.41547	0.002781	0.029246	-1.72201
CMBL	0.705047	7.52627	3.20268	0.004523	0.038532	-2.17637
CMYA5	0.55827	11.8002	5.13913	5.2e-05	0.0035	2.04831
CNN1	-1.74812	8.71744	-6.20473	4.91e-06	0.001355	4.2827
CNTNAP3B	0.909683	7.25177	4.98179	7.43e-05	0.004205	1.70786
COL14A1	1.34983	7.37156	4.10631	0.000561	0.011352	-0.21277
COL21A1	0.556909	6.34511	4.05072	0.000639	0.012219	-0.3352
COL6A1	-0.52639	8.36343	-4.63091	0.000166	0.006171	0.94193
COL6A3	-0.96278	8.75772	-4.44926	0.000253	0.00742	0.542787
COLGALT2	0.667365	6.53343	3.84763	0.001024	0.016116	-0.78168
COQ5	0.565439	7.84561	3.45154	0.00256	0.027716	-1.64429
COQ9	0.762571	10.1664	3.84729	0.001025	0.016116	-0.78243
CORO1A	-0.51414	6.69699	-3.44171	0.002618	0.028182	-1.66548
CORO1C	-0.69389	9.01776	-3.247	0.004089	0.036289	-2.08235
COTL1	-0.73327	7.17452	-4.44828	0.000254	0.00742	0.54063
CPE	0.873612	7.83222	4.27701	0.000378	0.00908	0.163411
CPEB3	0.760113	7.10337	5.00678	7.02e-05	0.004085	1.76208
CPED1	0.636839	8.55127	4.11604	0.000549	0.011222	-0.19133
CPT1B	0.765356	8.54145	5.04455	6.44e-05	0.003861	1.8439
CPT2	0.701033	6.79625	4.36046	0.000311	0.008288	0.347277
CR1	-0.63735	5.37605	-6.28576	4.13e-06	0.00126	4.4466
CRBN	0.683031	8.6529	5.19229	4.61e-05	0.003272	2.16282
CREBRF	0.857885	8.03995	6.01052	7.48e-06	0.001579	3.88615
CRIP2	0.531384	11.0303	3.27612	0.003826	0.034928	-2.0204
CRIPT	0.661828	8.29471	4.40709	0.000279	0.007735	0.449976
CRISPLD1	0.883526	5.3611	4.34719	0.000321	0.008425	0.318042
CRISPLD2	-0.94229	6.93285	-5.07186	6.05e-05	0.003704	1.903
CRYM	1.27182	7.71149	4.95052	7.98e-05	0.004393	1.63995
CSNK1D	-0.53263	8.70063	-5.07837	5.97e-05	0.003704	1.91708
CSRNP1	-0.9965	5.77062	-7.25635	5.5e-07	0.000462	6.33434
CSRNP3	0.817772	6.1251	6.51307	2.55e-06	0.001055	4.90133
CTDSPL	0.536446	8.41957	4.44366	0.000257	0.007432	0.530459
CTIF	-0.69765	7.39995	-4.24225	0.000409	0.00939	0.086823
CTPS1	-0.83442	6.25059	-4.27561	0.000379	0.009094	0.160336
CTSC	-1.31553	7.49611	-5.94274	8.67e-06	0.001678	3.74653
CTSF	0.680551	7.40098	3.71967	0.001378	0.019247	-1.06189
CTSK	1.0222	7.50532	3.96274	0.000784	0.013725	-0.52881
CTSO	0.831629	6.91604	3.51861	0.002194	0.025385	-1.49936
CX3CR1	0.856941	6.33319	4.09364	0.000578	0.011518	-0.24067
CYBB	-0.75946	8.05483	-3.79783	0.00115	0.017279	-0.89087
CYBRD1	0.738481	9.78387	3.32823	0.003397	0.032697	-1.90917
CYP1B1	-1.98706	7.66109	-4.15731	0.000499	0.010583	-0.10039
CYP4X1	0.677447	6.7259	3.27855	0.003805	0.034829	-2.01522
CYSLTR2	0.671695	6.41537	3.56978	0.001949	0.023654	-1.3884
CYTH4	-0.56299	6.51845	-4.62587	0.000168	0.006198	0.930869
CYYR1	0.522132	8.80151	4.77266	0.00012	0.005166	1.25231
DAGLB	-0.58839	6.53663	-3.25864	0.003982	0.035781	-2.05761
DAPK3	-0.78284	7.60694	-5.66385	1.6e-05	0.002181	3.16578
DAZ4	1.40159	5.12839	5.54378	2.09e-05	0.002349	2.91279
DAZAP1	-0.51441	7.39357	-5.18837	4.65e-05	0.003272	2.15438
DBNL	-0.58667	7.36985	-5.73689	1.36e-05	0.002025	3.31884
DCLK1	-0.83689	6.69296	-3.99373	0.000729	0.013127	-0.46065
DCLK2	0.515974	7.13728	3.77111	0.001223	0.017968	-0.94937
DDO	0.579546	6.73556	4.65782	0.000156	0.005964	1.00093
DDR1	0.592938	5.61249	3.93603	0.000834	0.014222	-0.58756
DDX21	-1.04388	6.93621	-4.23523	0.000416	0.009437	0.071334
DDX3X	-0.61336	8.53436	-3.37379	0.00306	0.030974	-1.81156
DDX3Y	1.71324	6.97928	3.97012	0.000771	0.013576	-0.51258
DDX60	0.518108	6.41134	4.26077	0.000392	0.009176	0.127637
DDX60L	0.529537	6.59341	3.5492	0.002044	0.024404	-1.43306
DEFB105B	0.73676	4.97422	3.28063	0.003787	0.03473	-2.01079
DEFB107A	0.638911	4.26036	3.67276	0.001536	0.020416	-1.16428
DEFB109P1B	0.64102	4.27431	3.76966	0.001227	0.018002	-0.95255
DEFB130	0.565825	4.39029	3.67261	0.001537	0.020416	-1.16462
DENND1B	0.607865	7.71652	4.86942	9.61e-05	0.004787	1.46347
DEPTOR	0.665927	6.83168	3.86069	0.000994	0.015768	-0.75304
DET1	0.52885	6.58131	3.93707	0.000832	0.0142	-0.58526
DGKD	-0.94555	8.15864	-3.82978	0.001068	0.016461	-0.82083
DHCR24	-1.15153	8.03404	-5.74073	1.35e-05	0.002025	3.32687
DHRS11	0.577003	7.4462	5.18839	4.65e-05	0.003272	2.15444
DHRS7C	-0.66086	5.63025	-5.08821	5.83e-05	0.003675	1.93835
DHX16	-0.50348	7.68368	-3.56503	0.001971	0.023794	-1.39871
DHX37	-0.50442	6.42064	-3.49791	0.002301	0.026072	-1.54414
DIRAS3	1.00633	6.63982	3.28106	0.003783	0.03473	-2.00988
DKK1	-1.18059	5.0465	-3.177	0.004794	0.039911	-2.23067
DLG1	-0.93446	9.16488	-3.62927	0.001699	0.021589	-1.25906
DLGAP1-AS1	-0.56446	6.95638	-3.26044	0.003965	0.035668	-2.05378
DLK1	-0.89706	7.06996	-3.17677	0.004797	0.039915	-2.23115
DMPK	-0.57385	9.08154	-4.92376	8.49e-05	0.004496	1.58178
DNAJA4	-0.95877	9.12347	-3.67095	0.001543	0.020467	-1.16825
DNAJB5	-0.7325	9.20307	-4.94199	8.14e-05	0.004431	1.62141
DNAJC19	0.620667	7.75534	3.72433	0.001363	0.019146	-1.05169
DNAJC28	0.556674	5.9411	3.04736	0.006426	0.048374	-2.50272
DNALI1	0.611191	6.62972	5.36639	3.11e-05	0.002723	2.53594
DNM3	0.524625	6.21779	3.3754	0.003049	0.030901	-1.80812
DOCK2	-0.51203	6.22824	-4.45216	0.000252	0.007409	0.549173
DOPEY1	0.549815	7.62977	4.34162	0.000325	0.008501	0.305792
DOT1L	-0.62488	6.96879	-3.86597	0.000982	0.015711	-0.74143
DPH2	-0.69248	6.47378	-4.21539	0.000436	0.009611	0.027607
DPH5	0.522011	6.08483	3.44319	0.002609	0.028126	-1.66229
DPP3	-0.59909	7.04355	-3.49745	0.002303	0.026072	-1.54514
DPY19L2	0.540717	7.85462	4.23586	0.000416	0.009433	0.072732
DPY19L2P1	0.706413	8.83665	3.17774	0.004786	0.039888	-2.2291
DPY19L2P2	0.735071	6.43699	4.10971	0.000557	0.011328	-0.20526
DPY19L2P4	0.524339	5.68023	3.71142	0.001405	0.01943	-1.0799
DRAP1	-1.02307	8.5674	-4.96252	7.77e-05	0.004322	1.66601
DSC1	2.49884	7.5763	7.98362	1.32e-07	0.00028	7.65407
DSCR3	-0.5576	8.50899	-3.47727	0.002413	0.026805	-1.58877
DSG1	0.691261	5.05327	3.90908	0.000888	0.014718	-0.64677
DSG2	0.610874	8.11407	4.17878	0.000474	0.010207	-0.05307
DTWD2	0.604614	7.68177	3.62509	0.001715	0.0217	-1.26816
DUS1L	-0.55533	7.12321	-3.54203	0.002078	0.024663	-1.44861
DUSP19	0.836212	5.60959	4.7503	0.000126	0.005283	1.20343
DUSP5	-1.14738	7.29503	-7.67756	2.39e-07	0.000363	7.10869
DYNC2H1	0.552494	5.16997	4.69754	0.000143	0.005635	1.08797
DZIP3	0.859251	6.97654	4.40771	0.000279	0.007735	0.451327
EBNA1BP2	-0.84493	7.55105	-4.02336	0.000681	0.012556	-0.39543
ECH1	0.669767	11.592	3.40173	0.00287	0.029794	-1.75156
ECM2	1.00925	6.63614	4.74312	0.000128	0.005348	1.18773
EFCAB2	0.529693	6.25968	3.21069	0.004441	0.038092	-2.15941
EFCAB7	0.586467	6.09145	5.33102	3.37e-05	0.002802	2.4604
EFHC1	0.767817	6.2739	4.84614	0.000101	0.004898	1.41273
EFHD1	0.594354	9.21524	3.56838	0.001956	0.023682	-1.39144
EGF	0.553831	6.6542	3.26945	0.003885	0.035199	-2.03462
EHD3	0.747544	7.50702	3.2363	0.00419	0.036811	-2.10509
EHHADH	0.832405	6.49535	3.41555	0.002781	0.029246	-1.72182
EIF1AY	3.36659	8.70823	5.30739	3.55e-05	0.002884	2.40986
EIF2AK2	0.538507	7.98806	4.00118	0.000717	0.013018	-0.44426
EIF3B	-0.67395	7.74801	-4.62255	0.00017	0.006212	0.923589
EIF3I	-0.8867	8.91659	-5.90988	9.31e-06	0.001683	3.67863
EIF4A1	-0.81043	8.82127	-5.13097	5.29e-05	0.00353	2.03071
EIF4G1	-0.63591	8.4634	-3.95634	0.000796	0.013813	-0.54289
EIF4H	-0.61588	9.10801	-3.40672	0.002838	0.029593	-1.74084
EIF5AL1	-0.6519	9.63329	-3.56797	0.001958	0.023682	-1.39233
EIF5B	-0.58862	9.002	-3.17257	0.004843	0.040165	-2.24003
EIF6	-0.61371	7.8693	-3.62692	0.001708	0.021622	-1.26418
ELL2	-1.34988	7.93459	-5.55142	2.06e-05	0.002349	2.92893
ELOVL6	-1.63925	5.50777	-4.13325	0.000527	0.01087	-0.1534
EMC6	-0.64129	6.55668	-3.49943	0.002293	0.026012	-1.54085
EMILIN1	-0.57865	6.71058	-5.19813	4.55e-05	0.003269	2.17538
EMILIN2	-0.57481	6.99614	-4.30651	0.000353	0.008857	0.228419
EMP1	-0.74323	8.31619	-3.52932	0.00214	0.025013	-1.47616
EMP3	-1.01708	8.33812	-5.31397	3.5e-05	0.002853	2.42392
ENO1	-0.86927	9.57181	-4.86724	9.66e-05	0.004787	1.45871
ENTPD1	0.630031	7.71117	3.58585	0.001878	0.023107	-1.3535
EPB41L2	0.611608	8.13502	3.06607	0.006161	0.046976	-2.46368
EPB41L3	-0.56398	6.74402	-4.15907	0.000497	0.01055	-0.0965
EPCAM	0.585582	4.64976	3.37172	0.003075	0.031084	-1.81601
EPHA7	1.01962	6.74014	6.10783	6.05e-06	0.001434	4.08551
EPHX2	0.840887	6.23405	4.56198	0.000195	0.006693	0.790635
ERI2	0.566382	5.76602	3.48103	0.002392	0.026654	-1.58062
ERMP1	0.643674	7.26412	3.97285	0.000766	0.013514	-0.50658
ERRFI1	-0.94057	7.4652	-3.8243	0.001081	0.01657	-0.83286
ERVH-4	0.688684	6.49454	3.0349	0.006608	0.049125	-2.52869
ETFDH	0.824455	9.35116	3.72204	0.001371	0.019195	-1.0567
EXOC6B	0.57002	10.0559	3.88632	0.000936	0.015261	-0.69676
EXOSC2	-0.50811	7.86855	-3.28633	0.003738	0.03442	-1.99864
EZH1	0.627414	8.12648	4.32632	0.000337	0.008604	0.272075
F2RL1	-0.53204	6.36298	-3.78363	0.001188	0.017621	-0.92197
FADS1	-0.75498	8.09735	-4.8456	0.000102	0.004898	1.41154
FADS3	-1.03065	8.94157	-6.12215	5.87e-06	0.001434	4.11472
FAIM2	-1.05731	6.74766	-4.80408	0.000112	0.005033	1.32095
FAM117B	0.648164	7.21529	6.73302	1.61e-06	0.000922	5.33411
FAM127C	-0.54973	9.0446	-3.70107	0.001439	0.019712	-1.10251
FAM134B	1.1334	9.35561	4.22101	0.00043	0.009539	0.039995
FAM13A	0.697338	6.96551	6.5891	2.17e-06	0.000998	5.05176
FAM13C	0.812421	6.68912	3.91864	0.000869	0.014563	-0.62577
FAM179B	0.546598	7.68551	5.33152	3.36e-05	0.002802	2.46147
FAM214A	0.57712	7.77591	3.03095	0.006667	0.049415	-2.53691
FAM216A	-0.60675	6.16949	-3.55339	0.002025	0.024224	-1.42397
FAM216B	0.69727	3.91387	5.17243	4.82e-05	0.003323	2.12007
FAM217B	0.840666	7.43437	5.11559	5.48e-05	0.00357	1.99752
FAM227B	0.668288	5.76956	5.49119	2.35e-05	0.002464	2.80144
FAM46B	-0.91912	6.93853	-3.96376	0.000782	0.013719	-0.52658
FAM60A	-0.60666	4.3025	-3.23438	0.004208	0.036924	-2.10916
FAM63A	0.742682	8.04379	3.78847	0.001175	0.017491	-0.91137
FAM83B	0.568798	5.45309	4.41601	0.000274	0.007677	0.46962
FAM90A7P	0.578571	4.60484	3.07243	0.006073	0.046698	-2.45041
FASN	-0.90292	6.15429	-8.22228	8.39e-08	0.00028	8.06934
FAXDC2	1.68179	8.49492	8.16035	9.43e-08	0.00028	7.96243
FBL	-0.56567	8.00929	-4.52232	0.000214	0.006991	0.703486
FBXL19-AS1	-0.5143	4.5162	-4.68653	0.000146	0.005701	1.06384
FBXL20	0.506588	7.61762	3.92563	0.000855	0.0144	-0.6104
FBXL4	0.551101	7.29559	3.81432	0.001107	0.016818	-0.85473
FBXO25	0.515328	8.3601	5.4096	2.82e-05	0.002645	2.62806
FBXO32	1.48937	10.0037	4.99458	7.22e-05	0.004143	1.73561
FBXO40	1.89501	9.67722	4.29402	0.000363	0.008904	0.200911
FCER1A	0.594293	5.75862	4.46868	0.000242	0.007326	0.585516
FCER1G	-0.86426	7.07549	-3.95323	0.000801	0.013869	-0.54974
FCGBP	-0.5301	5.59122	-4.20555	0.000446	0.009748	0.005919
FCGR3A	-0.72611	6.22208	-4.48745	0.000232	0.007272	0.626807
FCN3	-0.98632	7.88065	-3.21993	0.004349	0.037521	-2.13982
FDFT1	0.613974	9.45259	5.23548	4.18e-05	0.003127	2.25568
FGD4	0.536432	7.55516	3.30515	0.003581	0.033762	-1.9585
FGD6	0.639851	7.53195	4.22114	0.00043	0.009539	0.040296
FGF1	1.00031	7.66189	5.08818	5.83e-05	0.003675	1.93829
FGF12	1.19379	9.65606	3.40123	0.002874	0.029798	-1.75262
FHIT	0.579121	7.69624	3.14856	0.005113	0.041622	-2.29064
FHL1	-0.77759	11.5918	-4.93481	8.28e-05	0.004457	1.60581
FHL3	-0.70777	7.13069	-4.63405	0.000165	0.006164	0.948811
FHL5	0.792232	6.33598	3.60421	0.0018	0.022422	-1.3136
FITM2	0.702274	9.78892	3.67363	0.001533	0.020394	-1.16239
FKBP11	-0.56133	6.52009	-4.41575	0.000274	0.007677	0.469027
FKBP4	-0.51725	8.15432	-3.35768	0.003175	0.031544	-1.84612
FLII	-0.8496	8.32849	-7.22165	5.9e-07	0.000475	6.26931
FLJ30064	-0.82342	5.81762	-4.41652	0.000273	0.007677	0.470727
FLJ37453	-0.54967	4.65606	-3.83438	0.001056	0.016399	-0.81075
FLJ43315	0.87685	5.73903	3.35219	0.003215	0.031777	-1.85789
FLNC	-1.57715	11.2744	-5.04594	6.42e-05	0.003861	1.84692
FMO2	1.25153	8.49383	5.16887	4.86e-05	0.003338	2.11241
FMO3	1.39632	7.03378	6.15369	5.48e-06	0.001416	4.179
FMO4	1.32962	7.08734	6.74985	1.55e-06	0.000918	5.36693
FNDC1	0.700863	6.77602	4.4953	0.000228	0.007265	0.644079
FNDC5	0.743135	7.95938	3.50485	0.002264	0.025835	-1.52914
FNIP1	0.514501	8.40468	4.80979	0.00011	0.005006	1.3334
FOSL2	-1.13587	8.40503	-7.03171	8.67e-07	0.000646	5.91013
FPGT-TNNI3K	0.823486	7.48423	3.52395	0.002167	0.025195	-1.48779
FPR1	-1.13613	5.52873	-7.63263	2.61e-07	0.000363	7.0274
FREM1	0.899054	6.29016	5.49273	2.34e-05	0.002464	2.8047
FRK	0.952108	6.96502	5.35943	3.16e-05	0.002754	2.52108
FRMD4B	0.63715	8.21214	3.37858	0.003027	0.030738	-1.80129
FRZB	2.26475	7.32356	5.94605	8.61e-06	0.001678	3.75338
FSTL3	-1.0982	8.39573	-5.92464	9.02e-06	0.001683	3.70915
FTSJ1	-0.62542	6.69931	-4.72952	0.000133	0.005437	1.15796
FURIN	-0.90779	7.72396	-6.90159	1.13e-06	0.000691	5.66088
FUS	-0.56237	8.72651	-4.47158	0.00024	0.007326	0.591905
FXR1	0.51533	9.45703	3.33419	0.003351	0.03241	-1.89643
FYCO1	0.604114	8.48011	3.12861	0.00535	0.042904	-2.33263
FZD4	0.52187	7.54483	3.81679	0.0011	0.01677	-0.84932
FZD7	0.826158	7.03579	6.46331	2.83e-06	0.001055	4.80244
G6PD	-0.62953	6.98084	-5.04435	6.45e-05	0.003861	1.84347
GABARAPL2	0.530431	10.7341	5.27663	3.81e-05	0.00296	2.34395
GABPB2	0.690036	7.05921	5.41007	2.82e-05	0.002645	2.62905
GADD45B	-0.65724	7.10848	-4.05879	0.000627	0.012103	-0.31743
GADD45G	-0.77647	6.32699	-3.19449	0.004608	0.038986	-2.19371
GAGE12F	0.920123	3.26912	3.65927	0.001585	0.020782	-1.1937
GAP43	-1.06791	6.1968	-4.42889	0.000265	0.007537	0.497951
GARNL3	0.752963	7.77988	4.70786	0.000139	0.005546	1.11057
GART	-0.56428	7.17468	-3.80247	0.001137	0.017183	-0.8807
GAS2	0.70921	6.62475	4.43531	0.000262	0.007482	0.51209
GAS7	-0.52621	7.38665	-5.8812	9.92e-06	0.001706	3.61926
GAS8	0.675038	7.45262	4.79729	0.000113	0.005077	1.30611
GATAD2A	-0.55073	7.57795	-3.64875	0.001624	0.021101	-1.21663
GBE1	-0.83063	8.82002	-4.71432	0.000137	0.005507	1.1247
GBP4	0.837387	6.73053	3.49532	0.002315	0.026127	-1.54974
GCOM1	0.760099	10.9119	4.14916	0.000508	0.010696	-0.11834
GFPT2	-1.78526	6.59417	-8.2798	7.53e-08	0.00028	8.16811
GGTA1P	1.61478	7.11121	4.57779	0.000188	0.0066	0.825353
GHR	0.649575	7.63697	3.66341	0.00157	0.020682	-1.18468
GIMAP4	0.508571	6.98529	3.02478	0.00676	0.049795	-2.54974
GJA1	0.741355	9.76519	3.66223	0.001574	0.020694	-1.18726
GJA5	1.50715	7.81663	4.07982	0.000597	0.011709	-0.27111
GLCCI1	0.542449	6.79512	4.29874	0.000359	0.008894	0.211307
GLIDR	0.591857	7.22296	3.873	0.000966	0.015532	-0.72601
GLRX	0.742645	8.41067	4.66763	0.000153	0.005898	1.02243
GLT8D2	0.961787	7.45591	4.42917	0.000265	0.007537	0.498577
GLUL	-0.53548	9.63007	-3.67904	0.001514	0.020288	-1.1506
GMPPB	-0.52854	6.66956	-4.74292	0.000129	0.005348	1.18728
GNL3	-0.96419	6.61057	-4.75994	0.000124	0.005221	1.2245
GNPNAT1	-0.81815	6.50252	-3.1411	0.0052	0.042127	-2.30635
GOLGA8O	0.570638	7.40553	4.24999	0.000402	0.009275	0.103873
GOT1	0.702088	11.485	3.74464	0.001301	0.01867	-1.00729
GOT2	0.571699	11.8326	3.73143	0.001341	0.01896	-1.03618
GPAM	0.75643	6.69853	4.94251	8.13e-05	0.004431	1.62254
GPAT4	-0.55997	6.75644	-5.40724	2.84e-05	0.002645	2.62302
GPCPD1	0.712712	7.42812	3.36924	0.003092	0.031157	-1.82132
GPR52	0.674557	7.18117	4.46232	0.000246	0.007356	0.571524
GPR63	0.59408	6.21344	3.41734	0.002769	0.029197	-1.71798
GPRASP1	0.552866	6.16458	3.2241	0.004308	0.037436	-2.13098
GRAMD1C	0.877536	5.57314	3.9506	0.000806	0.013938	-0.55551
GRB2	-0.5686	7.26189	-4.55226	0.0002	0.006762	0.769277
GRM1	0.713257	6.21548	4.99765	7.17e-05	0.004125	1.74227
GSTA4	0.566235	7.33261	4.55295	0.000199	0.006762	0.770788
GSTK1	0.646186	9.84113	3.66033	0.001581	0.020758	-1.19139
GSTM2	0.638657	8.72397	3.78868	0.001174	0.017491	-0.9109
GTDC1	0.50828	7.66548	3.82653	0.001076	0.016533	-0.82797
GTF2A1L	0.534338	5.35439	3.46615	0.002475	0.02718	-1.61277
GZMK	0.643768	4.49819	3.38755	0.002965	0.030397	-1.78202
H1F0	-0.65996	9.28667	-5.66031	1.61e-05	0.002181	3.15836
H3F3C	-0.6825	8.25435	-5.56464	2e-05	0.002336	2.95686
HADH	0.970542	9.35583	3.97429	0.000763	0.013505	-0.50342
HAND2-AS1	0.734396	8.50749	3.8001	0.001144	0.017239	-0.88589
HAPLN1	1.30759	6.26694	4.77334	0.00012	0.005166	1.25379
HAS2	-1.17227	6.07435	-6.32375	3.81e-06	0.001206	4.52313
HAVCR2	-0.7035	5.4168	-4.75679	0.000125	0.005234	1.21762
HBP1	0.509939	8.31006	3.47964	0.0024	0.026698	-1.58363
HCG8	0.676331	6.79891	4.67041	0.000152	0.005872	1.02853
HCK	-0.60017	6.34557	-5.33889	3.31e-05	0.002802	2.47721
HCP5	0.525241	6.75423	4.01991	0.000686	0.012634	-0.40303
HDAC9	0.544004	6.84065	4.04807	0.000643	0.012247	-0.34103
HEG1	0.662267	10.0364	4.43746	0.00026	0.007458	0.516832
HERC1	0.559131	8.38583	5.17723	4.77e-05	0.003321	2.13041
HERC6	0.760447	6.94631	3.95421	0.0008	0.013857	-0.54758
HFE2	1.35028	7.52502	4.75827	0.000124	0.005228	1.22086
HIF1A	-0.72427	9.39719	-4.59494	0.000181	0.006441	0.863005
HIST1H3E	0.711833	5.71588	4.95055	7.98e-05	0.004393	1.64001
HK2	-1.34068	7.21411	-5.90803	9.35e-06	0.001683	3.67481
HLA-DPA1	0.978118	9.70253	3.5752	0.001925	0.023453	-1.37663
HLA-DQA1	0.965599	8.38089	3.05296	0.006345	0.048042	-2.49105
HLA-DRB1	0.621357	9.68902	3.02604	0.006741	0.049691	-2.54712
HLA-F	0.537301	7.45833	3.73883	0.001318	0.018809	-1.01999
HLTF	0.665971	7.27354	3.48568	0.002367	0.026469	-1.57059
HMCN1	0.967171	6.73677	3.53144	0.00213	0.02492	-1.47155
HMGB2	0.608195	5.9183	3.89402	0.00092	0.015069	-0.67986
HMGCLL1	0.688714	5.45605	3.9345	0.000837	0.014242	-0.59091
HMGN2	0.913074	9.4243	4.30592	0.000353	0.008857	0.227117
HMGN3	0.826695	7.10558	3.72821	0.001351	0.019042	-1.04322
HMOX1	-0.7823	6.46167	-4.2968	0.000361	0.0089	0.207028
HN1	-0.50826	6.25438	-3.33759	0.003325	0.032344	-1.88914
HN1L	-0.54988	7.02238	-4.12835	0.000533	0.010984	-0.16421
HNRNPAB	-0.74919	9.31955	-6.04637	6.92e-06	0.001514	3.95974
HSP90AA4P	-0.69245	5.15804	-3.55157	0.002033	0.024312	-1.42792
HSPA2	1.14681	7.74577	3.54095	0.002083	0.024695	-1.45094
HSPA6	-0.63142	6.76853	-3.6353	0.001675	0.021482	-1.24593
HSPB1	-0.58482	12.4292	-4.83603	0.000104	0.00492	1.39068
HTR2B	1.25816	5.78843	3.76158	0.001251	0.018156	-0.97024
HTR4	1.1129	5.85816	6.46736	2.8e-06	0.001055	4.81051
HYKK	0.671599	6.87943	4.46379	0.000245	0.00735	0.574771
HYOU1	-0.75408	7.35263	-3.50383	0.00227	0.025852	-1.53134
IAPP	0.615721	3.40845	4.00761	0.000706	0.012942	-0.4301
IARS	-0.57607	9.09182	-4.00786	0.000706	0.012942	-0.42954
ICA1L	0.664722	5.6695	3.51729	0.0022	0.025408	-1.50221
ICAM1	-0.70042	7.15362	-3.60962	0.001778	0.022211	-1.30183
ICK	0.863334	7.49832	5.43141	2.69e-05	0.002589	2.67447
ID2	0.506585	8.07	3.36829	0.003099	0.031157	-1.82337
IDI2-AS1	0.642139	5.83593	3.67042	0.001545	0.020476	-1.1694
IFI30	-1.30334	8.27252	-6.0557	6.78e-06	0.001514	3.97888
IFI44L	1.1535	7.93803	4.75003	0.000126	0.005283	1.20284
IFI6	0.755439	9.01437	3.99676	0.000724	0.01307	-0.45399
IFIT1	0.787865	7.11732	3.97966	0.000754	0.013408	-0.4916
IFITM2	-0.60198	9.03912	-4.17652	0.000477	0.01024	-0.05805
IFITM3	-0.50877	9.79278	-3.67462	0.00153	0.020383	-1.16024
IFT80	0.791177	7.06313	5.65057	1.65e-05	0.002196	3.13789
IGBP1	0.553705	7.2439	3.63929	0.00166	0.021375	-1.23725
IGF2BP2	-0.58037	6.96377	-3.79532	0.001156	0.017331	-0.89635
IGFBP7	0.523453	11.6741	4.63241	0.000166	0.006164	0.945225
IGSF10	1.58131	6.74562	5.46379	2.5e-05	0.002517	2.7433
IL17RA	-0.51367	7.15297	-4.23464	0.000417	0.009439	0.070044
IL1R1	-1.00189	7.74611	-3.33031	0.003381	0.032605	-1.90473
IL1RL1	-0.94884	4.65512	-3.47028	0.002452	0.026973	-1.60386
IL24	-0.6503	4.27488	-3.93185	0.000842	0.014276	-0.59675
IL4R	-0.6036	6.87174	-4.09936	0.000571	0.011423	-0.22808
IL6	-1.13495	4.98221	-4.9066	8.83e-05	0.004568	1.54445
IMPACT	0.611195	7.17352	4.75029	0.000126	0.005283	1.20341
INMT	0.771123	8.63944	4.48539	0.000233	0.007272	0.622274
INTU	0.544763	6.0276	5.38239	3e-05	0.002682	2.57007
IPMK	-0.52903	7.12395	-3.47306	0.002436	0.026891	-1.59785
IPO4	-0.97819	6.83756	-5.37738	3.03e-05	0.002682	2.5594
IPO5	-0.72285	9.04512	-3.66727	0.001556	0.020575	-1.17627
IRAK1BP1	0.526483	5.92031	4.79871	0.000113	0.005071	1.30923
IRS2	-0.65233	7.43356	-3.79144	0.001167	0.017446	-0.90487
ISCU	1.11393	10.4238	6.54868	2.36e-06	0.001034	4.97189
ITGA11	0.529826	7.34785	3.02892	0.006698	0.049498	-2.54114
ITGA3	-0.93905	7.20836	-3.64406	0.001642	0.021222	-1.22685
ITGA5	-1.33325	8.96745	-3.40769	0.002831	0.029588	-1.73873
ITGA7	-0.75756	8.9059	-4.56746	0.000193	0.00665	0.802664
ITGA8	1.19426	5.98497	5.12459	5.37e-05	0.003534	2.01693
ITGAM	-0.6186	6.17767	-4.71433	0.000137	0.005507	1.12472
ITGB2	-0.66963	6.84992	-4.73898	0.00013	0.005371	1.17867
ITIH5	0.698159	7.70678	4.23667	0.000415	0.009426	0.074521
ITPKC	-0.50876	6.28048	-5.12885	5.32e-05	0.003534	2.02612
JAGN1	-0.65095	7.15157	-4.76298	0.000123	0.005221	1.23115
JAK2	0.577353	7.69194	3.28935	0.003712	0.034392	-1.99221
JAM2	0.863185	8.96527	5.53688	2.12e-05	0.002349	2.89819
JDP2	-0.50039	7.10918	-3.27191	0.003863	0.035043	-2.02937
JMY	0.753423	7.42511	3.77488	0.001213	0.017837	-0.94112
JPH1	-0.83029	7.77233	-5.45671	2.54e-05	0.002529	2.72825
JUN	-0.68504	7.64874	-4.22797	0.000423	0.009485	0.055345
JUNB	-1.14849	7.96486	-4.39503	0.000287	0.007868	0.423422
KANSL1L	0.580329	6.98507	5.70539	1.46e-05	0.002097	3.25291
KBTBD3	0.583436	5.34117	4.10822	0.000559	0.011328	-0.20856
KBTBD8	-0.63246	5.35381	-3.13828	0.005234	0.042268	-2.3123
KCNAB1	0.571971	5.89163	3.52483	0.002162	0.025195	-1.48587
KCNIP2	-1.35929	7.54121	-5.21068	4.42e-05	0.003247	2.20238
KCNJ2	0.632293	8.44613	3.17494	0.004817	0.040032	-2.23501
KCNJ3	1.30675	5.9935	4.10811	0.000559	0.011328	-0.20881
KCNN3	0.618566	6.82447	5.19083	4.62e-05	0.003272	2.15969
KDM5C	-0.63237	7.63695	-3.53284	0.002123	0.024912	-1.46852
KDM5D	1.44247	7.08937	4.25338	0.000399	0.009251	0.111343
KIAA0040	-0.61832	6.73597	-4.3318	0.000333	0.008596	0.284143
KIAA0930	-0.51529	6.8833	-5.57109	1.97e-05	0.00233	2.97047
KIAA1107	1.48475	6.58568	6.37049	3.45e-06	0.001156	4.61699
KIAA1551	0.533377	7.53756	4.81745	0.000108	0.004988	1.35014
KIF1B	-0.64154	8.19609	-4.29495	0.000362	0.008904	0.202963
KIZ	0.567843	6.85186	5.48918	2.36e-05	0.002464	2.79716
KLC2	-0.70029	7.55321	-6.12557	5.83e-06	0.001434	4.12171
KLF12	0.620148	7.88705	5.66212	1.61e-05	0.002181	3.16215
KLF16	-0.51278	6.93443	-3.36066	0.003154	0.031409	-1.83974
KLF6	-0.6321	7.72444	-3.44822	0.00258	0.027868	-1.65146
KLHDC1	0.676061	7.34416	5.39351	2.93e-05	0.002654	2.59379
KLHDC2	0.613556	8.58554	3.25661	0.004	0.035867	-2.06193
KLHDC8B	-0.69359	7.9721	-4.52846	0.000211	0.006955	0.716986
KLHL13	0.708194	6.27464	4.14959	0.000508	0.010696	-0.11741
KLHL24	0.942027	9.43402	3.83373	0.001058	0.016399	-0.81218
KLHL38	1.92427	8.14258	5.77167	1.26e-05	0.001986	3.39149
KLHL40	-0.8602	5.8164	-4.60085	0.000178	0.006437	0.875969
KLHL41	-0.62161	8.54619	-3.76738	0.001234	0.018045	-0.95754
KLHL7	0.852632	8.24621	3.27035	0.003877	0.035151	-2.03269
KLRG1	0.58979	5.88442	5.28553	3.73e-05	0.002946	2.36304
KRAS	-0.55685	6.87728	-3.62905	0.0017	0.021589	-1.25955
KRT8	-1.16459	8.77293	-4.567	0.000193	0.00665	0.801658
KRTAP9-2	0.572413	5.48741	4.06042	0.000625	0.012084	-0.31384
LAMA4	0.680074	8.99446	4.08848	0.000585	0.011611	-0.25204
LAMC2	-1.10959	5.57782	-3.27386	0.003846	0.034981	-2.02521
LANCL1	0.513508	8.51657	3.44523	0.002597	0.028015	-1.6579
LAPTM5	-0.95497	8.34562	-3.86755	0.000978	0.01568	-0.73798
LARGE1	-0.56342	9.24223	-4.11397	0.000552	0.011254	-0.19589
LBH	-0.93033	8.65215	-5.55869	2.02e-05	0.002349	2.94429
LCLAT1	-0.80213	9.19269	-4.61047	0.000174	0.006307	0.897082
LCP1	-0.78252	7.86828	-3.58133	0.001898	0.023239	-1.36333
LDB2	0.677266	8.22354	4.51822	0.000216	0.007035	0.69446
LDHA	-0.92051	10.3818	-4.85404	9.96e-05	0.004879	1.42995
LDLR	-1.00683	7.95886	-4.62251	0.00017	0.006212	0.923497
LETMD1	0.549009	8.47904	4.04099	0.000654	0.012351	-0.35662
LGALS1	-0.52642	10.6277	-3.35912	0.003165	0.031475	-1.84304
LGR4	-0.62025	7.83264	-4.24107	0.000411	0.009397	0.084223
LHFPL2	-0.5879	7.42068	-3.45336	0.002549	0.027674	-1.64037
LIAS	0.72189	6.54577	4.45884	0.000248	0.007357	0.563874
LIF	-0.58713	5.15561	-3.70303	0.001432	0.019636	-1.09822
LIG4	-0.57622	6.86073	-3.32706	0.003406	0.032754	-1.91168
LILRA5	-0.5688	5.04057	-6.58998	2.17e-06	0.000998	5.05349
LILRB2	-0.59579	6.04871	-5.60473	1.83e-05	0.002271	3.04143
LILRB3	-0.68455	6.59331	-5.63649	1.7e-05	0.002196	3.10829
LILRB5	-0.52108	6.16233	-5.45892	2.53e-05	0.002529	2.73295
LIMCH1	0.743924	8.91994	4.53495	0.000208	0.00689	0.731248
LIMD1-AS1	0.703052	5.68151	3.76628	0.001237	0.018065	-0.95995
LINC00260	-0.77921	5.90255	-4.38442	0.000294	0.007966	0.400047
LINC00268	0.85381	7.29169	4.2856	0.00037	0.008971	0.182344
LINC00312	-1.68958	5.90329	-4.08417	0.000591	0.011659	-0.26153
LINC00472	0.647661	7.71857	3.98287	0.000748	0.013364	-0.48454
LINC00965	1.09051	7.27664	7.56	3e-07	0.000363	6.89533
LINC00998	0.592646	7.71403	3.03014	0.006679	0.049452	-2.53859
LIPG	-1.44739	5.53525	-5.24035	4.13e-05	0.003104	2.26614
LIPT1	0.521692	6.40577	3.91446	0.000877	0.014622	-0.63496
LMCD1	-1.69503	8.3225	-4.73026	0.000132	0.005437	1.1596
LMNB2	-0.63532	6.94631	-5.43764	2.65e-05	0.002578	2.68771
LMO3	1.36955	6.13509	4.30466	0.000354	0.008857	0.224343
LMOD1	0.682721	6.55114	3.2429	0.004127	0.036459	-2.09108
LMOD2	0.848609	10.455	4.34916	0.000319	0.008408	0.322384
LMOD3	1.00997	9.27351	3.57797	0.001913	0.023348	-1.37063
LOC100128816	0.57898	6.50001	3.77607	0.001209	0.017814	-0.93852
LOC100130691	0.589982	5.73499	4.40328	0.000282	0.007751	0.441574
LOC100133315	0.683207	6.61276	3.97556	0.000761	0.0135	-0.50063
LOC100287497	0.672629	7.12515	4.71758	0.000136	0.005499	1.13183
LOC100287896	0.592042	5.65276	3.8323	0.001061	0.016414	-0.81531
LOC100506730	0.583208	6.50267	3.3531	0.003209	0.031769	-1.85593
LOC101060256	0.706479	11.1549	4.2385	0.000413	0.009418	0.078546
LOC101928841	-0.53899	7.63153	-3.07367	0.006056	0.046638	-2.4478
LOC153684	0.543137	5.97774	5.22495	4.28e-05	0.003187	2.23306
LOC389834	1.04674	7.36867	3.28076	0.003786	0.03473	-2.01052
LOC400590	0.646625	7.90789	5.10832	5.57e-05	0.003599	1.9818
LOC650293	0.803802	6.39173	4.99892	7.15e-05	0.004125	1.74503
LOC728323	0.875365	8.08734	4.79256	0.000115	0.005091	1.2958
LOC93463	0.507506	5.48965	4.04239	0.000651	0.012341	-0.35356
LOXL4	-0.63057	6.27033	-3.65479	0.001602	0.02089	-1.20348
LPAR4	0.902583	5.6887	4.64421	0.000161	0.00612	0.971109
LPAR6	0.553693	7.8681	3.08653	0.005883	0.045776	-2.42091
LRIG1	0.591406	9.12461	3.05038	0.006382	0.048192	-2.49644
LRRC28	0.561626	8.08684	4.82729	0.000106	0.004972	1.37161
LRRC37A2	0.647381	7.0254	4.595	0.000181	0.006441	0.863129
LRRC37A4P	0.636764	7.18819	4.70849	0.000139	0.005546	1.11194
LRRC37B	0.638596	7.03913	4.7597	0.000124	0.005221	1.22398
LRRC39	1.37489	9.70304	4.99152	7.27e-05	0.00416	1.72897
LRRC49	0.52298	8.45457	4.44092	0.000258	0.007432	0.524432
LRRC59	-1.17351	8.14638	-5.46956	2.47e-05	0.002509	2.75554
LRRC8A	-0.54429	7.74988	-3.3526	0.003212	0.031774	-1.857
LRRC8B	-0.99953	7.01394	-4.62278	0.00017	0.006212	0.924091
LRRCC1	0.783442	6.06749	4.66197	0.000155	0.00593	1.01004
LRRK2	0.573049	5.82539	3.94061	0.000825	0.014137	-0.57749
LRRTM4	0.522215	5.71403	3.36899	0.003094	0.031157	-1.82187
LTBP1	0.758428	9.43186	4.77383	0.00012	0.005166	1.25488
LTBR	-0.73833	7.5998	-6.14625	5.57e-06	0.00142	4.16385
LY75-CD302	0.583383	7.02968	4.86665	9.67e-05	0.004787	1.45743
LY96	-1.49666	5.89182	-3.74109	0.001311	0.018754	-1.01507
LYPLAL1	0.787911	6.99676	5.33162	3.36e-05	0.002802	2.46168
LYVE1	-0.94689	8.40873	-4.14067	0.000518	0.010773	-0.13707
MAEL	0.600057	5.93713	3.41705	0.002771	0.029201	-1.71859
MAFB	-0.5331	6.97532	-4.40179	0.000283	0.007767	0.438302
MAL2	-1.16485	5.81211	-3.50416	0.002268	0.025852	-1.53063
MAOB	0.829545	8.88938	3.22067	0.004341	0.037521	-2.13825
MAP2K1	-0.93437	8.3462	-4.44932	0.000253	0.00742	0.542914
MAP2K3	-1.30424	7.62746	-5.2067	4.46e-05	0.003253	2.19381
MAP2K5	0.917685	7.72946	5.54288	2.09e-05	0.002349	2.91088
MAP3K3	-0.53075	7.95377	-3.13911	0.005224	0.04225	-2.31055
MAP3K5	0.651681	8.0187	5.48638	2.38e-05	0.002467	2.79124
MAP3K6	-0.57575	7.42948	-4.86144	9.79e-05	0.004813	1.44608
MAPK10	0.722297	6.44443	3.54916	0.002044	0.024404	-1.43314
MAPRE3	0.66934	8.0333	3.62821	0.001703	0.021599	-1.26138
MARS	-0.50363	7.88279	-4.15452	0.000502	0.010629	-0.10653
MATN2	0.85677	7.40862	4.23357	0.000418	0.009452	0.067685
MBD3	-0.56292	6.84784	-5.00373	7.07e-05	0.004092	1.75546
MBOAT1	0.670561	6.88112	5.05962	6.23e-05	0.003776	1.87654
MCFD2	-0.63926	7.77288	-3.4549	0.00254	0.027647	-1.63705
MCMDC2	0.675665	5.71642	4.02873	0.000672	0.012469	-0.38362
MDH1B	0.719109	5.06871	4.5341	0.000208	0.006893	0.729368
MEDAG	-1.59835	6.64847	-6.58655	2.18e-06	0.000998	5.04672
MEF2C	0.506853	9.83568	3.41079	0.002811	0.029424	-1.73208
MEIS1	-0.68071	7.75452	-3.6143	0.001759	0.022068	-1.29164
MELTF	-0.52107	6.47703	-3.29875	0.003633	0.034069	-1.97215
MEOX2	1.03066	7.80605	7.00095	9.24e-07	0.000646	5.85144
METTL1	-0.64288	5.73602	-3.38531	0.00298	0.030467	-1.78685
METTL22	-0.54423	6.98204	-4.47948	0.000236	0.007282	0.609276
METTL24	1.03489	6.01302	6.11835	5.92e-06	0.001434	4.10697
METTL25	0.526827	7.01794	4.16992	0.000484	0.010353	-0.0726
METTL7B	-1.45392	7.82394	-4.77406	0.00012	0.005166	1.25538
MFSD2A	-0.79559	5.18339	-4.10158	0.000568	0.01142	-0.22318
MGEA5	0.569815	8.45087	4.28754	0.000369	0.008971	0.186627
MGST1	-1.09885	5.89319	-4.09504	0.000576	0.011492	-0.23759
MGST2	0.552484	7.63164	4.20559	0.000446	0.009748	0.006012
MICU3	0.594968	6.66304	5.65304	1.64e-05	0.002196	3.14309
MID1	1.15392	8.38632	3.69145	0.001471	0.019979	-1.12351
MID1IP1	-0.54295	6.96564	-3.25507	0.004014	0.035913	-2.06521
MIDN	-0.54013	7.92049	-3.73671	0.001325	0.018841	-1.02464
MIER2	-0.53683	5.98974	-3.72034	0.001376	0.019247	-1.06042
MIR105-1	0.572716	4.74954	5.1465	5.11e-05	0.003467	2.0642
MIR107	0.586187	5.92369	3.33053	0.003379	0.032604	-1.90425
MIR145	1.39221	8.33264	3.85578	0.001005	0.015899	-0.7638
MIR15A	1.12597	5.47686	4.04633	0.000645	0.012263	-0.34486
MIR181B1	0.584262	5.80236	4.01702	0.000691	0.012708	-0.40939
MIR181B2	0.640996	4.86367	4.23884	0.000413	0.009418	0.079307
MIR218-1	0.817319	5.12513	4.69099	0.000145	0.005663	1.07361
MIR23B	0.727174	8.05218	3.51478	0.002213	0.02551	-1.50764
MIR30E	0.782475	5.99154	3.09556	0.005764	0.045169	-2.402
MIR365A	0.738862	6.11384	3.69558	0.001457	0.019856	-1.11449
MIR99A	0.731159	6.44202	3.71685	0.001387	0.019312	-1.06805
MIR99AHG	0.822664	6.12341	5.44451	2.61e-05	0.002551	2.70234
MIRLET7A2	0.759485	4.76346	3.04662	0.006436	0.048401	-2.50426
MIRLET7C	1.31086	4.9857	5.29557	3.65e-05	0.002911	2.38454
MIRLET7G	0.884749	5.38157	3.91367	0.000879	0.014634	-0.6367
MLLT3	0.79845	6.84632	5.5385	2.12e-05	0.002349	2.90162
MLYCD	0.575123	8.2692	4.25011	0.000402	0.009275	0.104135
MME	0.841137	6.64153	4.04069	0.000654	0.012351	-0.35728
MMP19	-0.54963	5.76249	-5.33244	3.36e-05	0.002802	2.46342
MNS1	1.30938	5.51956	5.40798	2.83e-05	0.002645	2.62462
MPDU1	-1.07229	8.74682	-5.29863	3.62e-05	0.002907	2.39109
MPPED2	0.732892	7.48057	4.43884	0.000259	0.007453	0.519867
MRTO4	-1.08604	5.58487	-4.55004	0.000201	0.006769	0.764393
MSANTD3	-0.68537	7.87561	-3.977	0.000758	0.013479	-0.49746
MSC	-0.68069	7.03572	-3.08462	0.005909	0.045923	-2.42491
MSN	-0.86103	10.078	-4.00029	0.000718	0.013023	-0.44621
MSR1	-0.94396	5.90577	-4.00556	0.00071	0.012968	-0.43461
MT1A	-0.82936	7.49745	-4.34979	0.000319	0.008407	0.323774
MT1JP	-0.50863	6.04559	-3.45427	0.002544	0.027648	-1.6384
MT1M	-1.0769	6.20627	-4.45622	0.000249	0.00738	0.558104
MTA2	-0.59907	7.72214	-5.12626	5.35e-05	0.003534	2.02054
MTCH1	-0.5465	8.30139	-4.46376	0.000245	0.00735	0.574696
MTHFD2	-0.813	6.98782	-4.06472	0.000618	0.012019	-0.30438
MTURN	0.635624	7.02233	3.98983	0.000736	0.013188	-0.46923
MTX2	0.616593	8.25963	3.35383	0.003203	0.031732	-1.85438
MUC3A	0.729759	6.73939	4.02957	0.000671	0.012468	-0.38176
MUSK	0.981681	6.03247	5.10466	5.62e-05	0.00361	1.97391
MVP	-0.54345	6.84461	-6.33247	3.74e-06	0.001206	4.54066
MYC	-1.76849	6.7383	-6.19234	5.05e-06	0.001372	4.25756
MYCT1	0.860164	8.00636	6.69056	1.75e-06	0.000944	5.25113
MYDGF	-0.88167	7.20777	-6.24231	4.53e-06	0.001304	4.35885
MYH10	0.807333	8.28677	5.11449	5.5e-05	0.00357	1.99514
MYH11	1.24798	7.45269	4.54283	0.000204	0.00683	0.748557
MYH9	-1.42025	8.81591	-5.10805	5.58e-05	0.003599	1.98122
MYL4	2.42685	9.4272	5.84122	1.08e-05	0.001787	3.5363
MYO1F	-0.52771	6.27332	-4.93855	8.21e-05	0.004431	1.61393
MYOM2	1.09297	11.0639	4.63222	0.000166	0.006164	0.944813
MYOT	-1.31891	6.832	-3.94216	0.000822	0.014118	-0.57408
N6AMT1	0.713685	6.66059	6.63031	1.99e-06	0.000998	5.13292
NAALADL2	0.540992	5.84852	3.19003	0.004654	0.039234	-2.20312
NABP1	-0.88981	6.13166	-5.75907	1.3e-05	0.002022	3.36519
NACC1	-0.69387	7.40487	-4.85156	0.0001	0.004887	1.42453
NAMPT	-0.86266	9.89636	-4.48036	0.000236	0.007282	0.611219
NAP1L3	1.0337	6.2702	4.477	0.000237	0.007302	0.603831
NAPEPLD	0.675961	6.36521	4.2866	0.000369	0.008971	0.184549
NBEAL1	0.533087	7.71024	4.41166	0.000276	0.007706	0.46004
NCAM1	-0.54681	10.1431	-3.0885	0.005857	0.045664	-2.41679
NCF4	-0.58575	5.98782	-4.39794	0.000285	0.007826	0.42982
NCKAP1L	-0.57261	6.37596	-3.7159	0.00139	0.019322	-1.07012
NCKAP5	1.07246	6.68011	4.32784	0.000336	0.008604	0.275431
NCLN	-0.57574	7.06923	-4.82573	0.000106	0.004977	1.3682
NCOA2	0.505681	8.01929	4.6919	0.000145	0.005663	1.07561
NCS1	-1.02686	6.70241	-3.54774	0.002051	0.024441	-1.43622
NDUFB5	0.631985	10.3623	4.10019	0.00057	0.011423	-0.22624
NEB	2.49001	7.59495	4.90344	8.89e-05	0.004568	1.53757
NEBL	0.621695	11.2703	4.0108	0.000701	0.012881	-0.42308
NECAB1	0.602464	5.65833	4.30141	0.000357	0.008864	0.217194
NEK1	0.560091	7.33606	5.95636	8.41e-06	0.001666	3.77465
NEK10	0.683968	6.1523	3.735	0.00133	0.018889	-1.02836
NEK3	0.668844	6.51737	4.33351	0.000331	0.008582	0.287919
NES	-0.60451	7.2507	-4.90963	8.77e-05	0.004568	1.55103
NEXN-AS1	-1.38849	6.11963	-4.0477	0.000643	0.012247	-0.34185
NF2	-0.88503	8.19365	-4.95259	7.95e-05	0.004393	1.64444
NFASC	0.591885	7.02978	4.35433	0.000316	0.008365	0.33378
NFE2L1	0.898705	10.2905	4.8213	0.000107	0.004983	1.35854
NGFR	-0.63272	6.97307	-4.68173	0.000148	0.005742	1.05334
NICN1	0.514385	7.3064	3.53949	0.002091	0.02472	-1.45412
NIT2	0.733185	9.24154	4.59444	0.000181	0.006441	0.861897
NKAPP1	0.548438	6.00191	4.21745	0.000434	0.009586	0.03215
NME1	-1.51546	7.22446	-4.95753	7.86e-05	0.004359	1.65517
NME5	0.581145	5.5331	3.63963	0.001659	0.021372	-1.2365
NMNAT3	0.591898	6.46277	4.50469	0.000223	0.007156	0.664721
NNMT	-1.0853	7.17767	-4.55852	0.000197	0.006724	0.783024
NNT	0.891996	10.9743	4.48259	0.000234	0.007282	0.616117
NOC2L	-0.67574	7.37452	-4.49313	0.000229	0.007272	0.63929
NOL6	-0.69819	6.37591	-5.30242	3.59e-05	0.002904	2.39921
NOP10	-0.80407	8.82767	-3.14339	0.005174	0.04196	-2.30155
NOP16	-0.7433	6.21461	-3.69923	0.001445	0.019756	-1.10654
NOP2	-0.74913	6.8351	-4.62582	0.000168	0.006198	0.930768
NOSIP	-0.59921	7.06141	-3.36853	0.003097	0.031157	-1.82285
NOV	0.693846	7.1753	3.68977	0.001477	0.020031	-1.12718
NPAS2	-0.56756	9.13062	-3.74283	0.001306	0.018734	-1.01125
NPAT	0.504214	7.69107	6.23426	4.61e-06	0.001308	4.34255
NPHP3-ACAD11	0.633049	7.71038	3.58128	0.001898	0.023239	-1.36343
NPPA	3.18776	10.3943	7.48919	3.46e-07	0.000363	6.76579
NPR3	1.41854	8.03165	6.18648	5.11e-06	0.001372	4.24568
NR2C2AP	-0.62872	5.97422	-4.49891	0.000226	0.007239	0.652004
NRG1	0.948157	5.68726	3.0697	0.006111	0.04682	-2.45609
NRK	0.867973	6.14713	4.12778	0.000534	0.010987	-0.16546
NRSN2	-0.5355	7.03276	-4.33547	0.00033	0.00856	0.292241
NT5C1A	0.623594	7.36163	3.42508	0.00272	0.02891	-1.70133
NT5DC3	-0.97351	6.09837	-4.46633	0.000243	0.007339	0.58036
NTN4	0.670566	8.56275	3.9157	0.000874	0.014622	-0.63223
NTRK2	0.766766	5.7296	4.29735	0.00036	0.0089	0.208234
NUDT4	-0.56949	11.2833	-4.00566	0.000709	0.012968	-0.4344
NUDT6	0.670982	7.20052	3.57462	0.001928	0.023471	-1.3779
NUDT7	1.65551	8.8881	4.93959	8.19e-05	0.004431	1.6162
NUP188	-0.6472	7.35616	-3.31914	0.003468	0.033131	-1.92861
OCIAD2	-0.62921	5.80997	-3.1575	0.005011	0.041004	-2.27181
OCR1	0.841154	9.8827	3.27359	0.003848	0.034987	-2.0258
OGN	1.16084	8.63142	3.14616	0.005141	0.041752	-2.29569
OLFML1	1.05822	6.90604	4.40413	0.000281	0.007749	0.44346
OLFML3	0.661617	7.54852	3.58332	0.001889	0.023214	-1.35899
OMA1	0.768111	7.18755	4.48005	0.000236	0.007282	0.610533
OMD	1.43154	7.20741	3.8792	0.000952	0.015371	-0.7124
OPN1SW	-0.53024	4.99218	-5.29435	3.66e-05	0.002911	2.38194
OR10K1	0.640094	5.79551	4.78565	0.000117	0.00512	1.2807
OR11H1	1.54547	5.81398	4.86217	9.77e-05	0.004813	1.44768
OR14A16	0.634779	4.6044	4.44522	0.000256	0.007432	0.533892
OR2A42	0.510364	6.29322	3.0411	0.006517	0.048733	-2.51578
OR2J3	0.671259	5.21258	3.52367	0.002168	0.025195	-1.4884
OR2L2	0.539387	4.86262	3.2921	0.003689	0.034341	-1.98635
OR2L8	0.94434	5.62889	3.7416	0.00131	0.018748	-1.01393
OR2M5	0.637123	5.4717	5.17364	4.8e-05	0.003323	2.12267
OR2M7	0.774833	4.62062	4.52483	0.000213	0.006987	0.708999
OR4C13	0.713668	5.32053	4.10067	0.000569	0.011423	-0.22518
OR4F29	0.987585	4.77171	3.67384	0.001533	0.020394	-1.16194
OR4F4	1.42466	5.68686	4.54305	0.000204	0.00683	0.749043
OR4K15	0.577794	4.56658	3.59277	0.001849	0.022866	-1.33846
OR4K2	0.942558	5.21432	3.10103	0.005694	0.044842	-2.39053
OR4K5	0.625837	4.72441	3.32839	0.003395	0.032697	-1.90883
OR4M2	0.731398	5.078	3.79958	0.001145	0.017247	-0.88703
OR51A4	0.536542	5.54909	3.14711	0.00513	0.041726	-2.29371
OR51B4	0.50593	4.43888	3.9739	0.000764	0.013505	-0.50429
OR51E1	0.585045	6.85621	4.28224	0.000373	0.009019	0.174954
OR51F2	0.720914	5.21195	4.258	0.000395	0.009182	0.12153
OR51L1	0.542659	4.61059	3.66978	0.001547	0.020476	-1.17079
OR5H15	0.664362	4.69125	3.49018	0.002342	0.026346	-1.56086
OR6B1	0.58979	5.13806	4.16275	0.000492	0.010472	-0.08841
OR6C3	0.554915	4.56413	4.44067	0.000258	0.007432	0.523895
OR6C76	0.71452	4.17407	3.08354	0.005923	0.045999	-2.42716
OR6P1	0.578345	5.13469	4.03106	0.000669	0.012448	-0.3785
OR7E125P	0.775581	5.96	4.67671	0.00015	0.005798	1.04235
OR7E13P	0.555475	4.76729	3.95988	0.000789	0.013775	-0.5351
OR8B3	0.611741	3.76457	3.42057	0.002749	0.029073	-1.71104
OR8K5	0.54585	3.87807	3.0818	0.005946	0.046126	-2.4308
OR9G1	0.58875	5.02279	3.07058	0.006098	0.04682	-2.45427
ORC3	0.601972	8.23328	4.13495	0.000525	0.010843	-0.14966
ORMDL2	-0.99172	7.84559	-4.8109	0.00011	0.005006	1.33583
OSGEPL1	0.552743	6.26744	3.83995	0.001043	0.016289	-0.79853
OSMR	-1.23384	7.89134	-4.56798	0.000192	0.00665	0.80381
OTUD1	-1.34975	7.91324	-4.48796	0.000232	0.007272	0.627921
OVOS2	0.644318	4.18364	4.22679	0.000424	0.009485	0.052742
P2RX5	-1.48704	7.08861	-4.20291	0.000449	0.009776	0.000117
P2RY13	1.0071	5.80212	6.35213	3.58e-06	0.001183	4.58016
P2RY14	1.53802	7.92477	6.09569	6.22e-06	0.001439	4.0607
P2RY2	-0.59977	7.39207	-4.79432	0.000114	0.005089	1.29963
PACRG	0.876391	6.56239	3.7132	0.001399	0.01939	-1.07602
PAG1	-0.61366	7.57104	-3.39539	0.002912	0.029984	-1.76518
PALMD	0.721868	10.2496	4.38307	0.000295	0.007981	0.397072
PAMR1	0.864017	6.72854	3.58795	0.001869	0.023023	-1.34893
PANK1	0.538412	6.96708	3.41394	0.002791	0.029303	-1.7253
PANX1	-0.7769	7.66334	-4.86104	9.8e-05	0.004813	1.44521
PARD3	-0.5341	7.63599	-3.62867	0.001701	0.021589	-1.26038
PARK2	0.778529	8.40645	3.51185	0.002228	0.025566	-1.51399
PARP8	0.620816	7.02319	5.08602	5.86e-05	0.003675	1.93363
PARVG	-0.55026	6.11125	-5.07091	6.07e-05	0.003704	1.90096
PCBD2	0.561196	6.82587	4.04905	0.000641	0.012232	-0.33889
PCCA	0.525713	7.67398	4.44525	0.000256	0.007432	0.533962
PCDH7	-1.43251	6.53994	-5.7377	1.36e-05	0.002025	3.32053
PCDHB18P	0.658578	6.24094	4.05006	0.00064	0.012223	-0.33666
PCDHB5	1.04607	7.09414	4.00457	0.000711	0.012985	-0.4368
PCLO	0.799069	5.38853	4.31507	0.000346	0.008724	0.247295
PCMTD1	0.638607	9.47178	3.56294	0.00198	0.023878	-1.40324
PCMTD2	0.823572	8.84179	3.88536	0.000938	0.015261	-0.69887
PCSK5	0.625802	6.94399	4.14786	0.00051	0.010696	-0.12122
PCYOX1	0.99715	8.99263	4.3666	0.000307	0.008203	0.360814
PDCD11	-0.57129	6.58165	-4.14617	0.000512	0.010713	-0.12493
PDCD4	0.726106	6.98528	4.54113	0.000205	0.006838	0.744812
PDE10A	-0.67237	7.212	-3.0325	0.006644	0.049318	-2.53368
PDE1A	1.00852	7.13343	3.71967	0.001378	0.019247	-1.06187
PDE4D	-0.56567	7.14465	-4.32449	0.000338	0.008604	0.268038
PDE5A	1.20707	7.15443	4.2155	0.000436	0.009611	0.027861
PDE7B	0.662772	7.99966	3.82676	0.001075	0.016533	-0.82745
PDGFRA	-0.58613	7.7872	-3.07098	0.006093	0.046797	-2.45344
PDIA4	-0.86514	7.31982	-4.32519	0.000338	0.008604	0.269584
PDIA6	-0.50292	9.02551	-4.18087	0.000472	0.010191	-0.04848
PDK2	0.5496	9.82842	3.5758	0.001922	0.023439	-1.37534
PDK3	0.730556	7.52648	5.56759	1.98e-05	0.002335	2.96308
PDPN	-0.92375	6.91732	-4.81916	0.000108	0.004983	1.35387
PEA15	-0.67119	10.5868	-5.29848	3.62e-05	0.002907	2.39077
PELO	0.654867	6.55157	5.82079	1.13e-05	0.001854	3.49382
PER1	-0.93384	7.56082	-4.3167	0.000344	0.008702	0.250882
PES1	-0.63785	6.55637	-4.46565	0.000244	0.007339	0.578846
PEX1	0.601007	7.92433	3.99969	0.000719	0.013028	-0.44753
PEX12	0.819019	6.82806	5.63179	1.72e-05	0.002205	3.0984
PEX7	0.635922	6.42831	4.40606	0.00028	0.007743	0.447698
PFKFB2	0.838105	7.5026	5.35443	3.19e-05	0.002773	2.51041
PFKFB3	-0.68334	7.00962	-5.69337	1.5e-05	0.002127	3.22773
PFKP	-0.55488	8.85688	-3.92958	0.000847	0.014305	-0.60174
PFN2	-0.67233	8.31219	-3.20418	0.004507	0.038476	-2.17319
PGAP2	0.743277	8.16895	3.98246	0.000749	0.013364	-0.48546
PGLS	-0.50363	5.918	-3.21759	0.004372	0.037705	-2.14478
PHC3	0.522325	9.6991	5.41062	2.82e-05	0.002645	2.63022
PHF23	-0.51662	6.15182	-4.79036	0.000115	0.005101	1.29098
PHF3	0.593824	8.23829	4.5204	0.000215	0.007011	0.699261
PHGDH	-0.58091	6.55509	-3.45249	0.002554	0.027685	-1.64225
PHLDA1	0.823395	7.59093	3.03702	0.006577	0.049018	-2.52427
PHTF2	-0.67156	7.48023	-4.71904	0.000136	0.005499	1.13504
PI15	-0.73877	4.72734	-3.12123	0.00544	0.043401	-2.34815
PI4K2A	-0.57773	7.47216	-3.30038	0.00362	0.034034	-1.96868
PIGA	-0.6671	5.92587	-3.7001	0.001442	0.019742	-1.10462
PIGW	-0.58723	5.76563	-3.19855	0.004565	0.038693	-2.18512
PIK3IP1	1.14255	7.01783	5.58894	1.89e-05	0.002271	3.00815
PIM1	-0.87006	7.08107	-6.08332	6.38e-06	0.001461	4.0354
PKD1L1	0.631574	7.17299	3.7928	0.001163	0.017403	-0.90188
PKNOX2	-0.56245	6.8031	-4.35238	0.000317	0.008378	0.329488
PLA2G2A	-1.73162	7.02008	-5.36981	3.09e-05	0.002714	2.54324
PLA2R1	0.738116	6.28639	3.43242	0.002675	0.028602	-1.6855
PLAG1	0.561711	6.59462	3.70757	0.001417	0.019503	-1.08832
PLAGL1	0.542692	7.60739	3.59511	0.001839	0.022763	-1.33338
PLAU	-0.93398	7.10537	-4.47252	0.00024	0.007322	0.593963
PLAUR	-0.82184	6.71059	-5.49636	2.32e-05	0.002463	2.8124
PLCB4	0.871272	8.1768	5.81295	1.15e-05	0.001871	3.4775
PLCE1	1.23855	8.80374	4.78355	0.000117	0.00512	1.2761
PLCH1	0.718189	5.31657	4.38819	0.000292	0.007939	0.408363
PLD1	0.662848	8.60627	4.04507	0.000647	0.012276	-0.34764
PLEK	-0.71451	5.75175	-4.45954	0.000247	0.007357	0.565412
PLEKHA5	0.592491	8.90452	3.66963	0.001548	0.020476	-1.17111
PLIN3	-0.83347	7.25408	-4.29632	0.000361	0.0089	0.205963
PLK2	1.05063	8.16228	3.67598	0.001525	0.020337	-1.15726
PLP2	-1.25111	9.53295	-5.57176	1.96e-05	0.00233	2.97189
PLPPR2	-0.51293	7.24818	-4.33047	0.000334	0.008604	0.281228
PLTP	-0.77275	8.61675	-3.79057	0.001169	0.017455	-0.90676
PLXNA1	-0.5761	7.78602	-3.99234	0.000732	0.013146	-0.4637
PLXNA4	0.767994	7.12094	4.83584	0.000104	0.00492	1.39027
PMEPA1	-1.11214	7.73967	-4.78211	0.000117	0.00512	1.27296
PMP2	0.562194	4.68121	3.13983	0.005215	0.042214	-2.30902
PMS2P1	0.525421	8.26758	3.43991	0.002629	0.028224	-1.66937
PMS2P2	0.506804	8.4718	3.94642	0.000814	0.014038	-0.5647
PMS2P4	0.640891	9.50886	4.76132	0.000123	0.005221	1.22752
PMS2P5	0.730457	8.68729	5.07053	6.07e-05	0.003704	1.90013
PNISR	0.586587	8.12794	3.20729	0.004475	0.038303	-2.16661
POGZ	0.597637	8.97488	5.64703	1.66e-05	0.002196	3.13045
POLB	0.535485	7.91287	3.51901	0.002192	0.025385	-1.49848
POLD2	-0.68112	8.2578	-5.9647	8.26e-06	0.001666	3.79183
PON2	0.557826	8.58355	4.97464	7.56e-05	0.004251	1.69233
POR	-0.6622	7.45086	-5.75624	1.31e-05	0.002022	3.35927
PPA1	-0.56185	7.15425	-3.67907	0.001514	0.020288	-1.15052
PPARGC1A	0.631462	9.83471	3.40681	0.002837	0.029593	-1.74063
PPFIBP2	0.578108	7.14818	4.82369	0.000107	0.004983	1.36376
PPM1G	-0.59867	7.68178	-3.81957	0.001093	0.016703	-0.84323
PPP1R12B	0.935487	10.5919	5.50314	2.29e-05	0.002456	2.82676
PPP1R14B	-0.78461	8.77656	-4.0251	0.000678	0.012551	-0.39161
PPP1R14C	0.558663	7.5231	3.67932	0.001513	0.020288	-1.14998
PPP1R1C	1.03305	8.79199	3.17074	0.004863	0.040266	-2.24389
PPP1R3A	0.934599	9.88203	4.63415	0.000165	0.006164	0.949032
PPP1R3C	1.06138	9.71256	4.34209	0.000325	0.008501	0.306817
PPP2CB	-0.65384	8.01552	-4.17469	0.000479	0.010261	-0.06207
PPP4C	-0.52567	7.39858	-4.28718	0.000369	0.008971	0.18582
PPP6R1	-0.58427	7.7849	-4.92172	8.53e-05	0.004496	1.57732
PPRC1	-0.57377	6.71435	-3.05429	0.006326	0.047931	-2.48827
PPWD1	0.567241	7.83735	3.59994	0.001818	0.022574	-1.32288
PRDM1	0.680227	6.11813	3.62329	0.001723	0.021776	-1.27208
PRDM5	0.526469	6.93355	3.94026	0.000826	0.014137	-0.57825
PRELID1	-0.61575	9.38335	-3.18982	0.004657	0.039237	-2.20358
PRELP	1.61332	8.60408	4.10569	0.000562	0.011357	-0.21414
PREX2	0.731537	7.91391	5.14628	5.11e-05	0.003467	2.06372
PRKAA2	0.671197	10.9012	4.57903	0.000188	0.0066	0.828079
PRKAB2	0.635127	9.03315	4.26044	0.000392	0.009176	0.126908
PRKAR2B	0.881743	7.87394	5.18337	4.7e-05	0.003298	2.14362
PRKD1	0.50635	6.39768	3.20624	0.004486	0.038353	-2.16883
PRKG1	0.580821	8.08915	4.05582	0.000631	0.012121	-0.32398
PRKY	0.597076	6.57599	3.798	0.001149	0.017279	-0.89049
PROX1	0.795004	7.7328	4.33541	0.00033	0.00856	0.292096
PRRC2A	-0.60379	8.99432	-3.11515	0.005515	0.043793	-2.36091
PRUNE1	0.83101	8.27861	4.20818	0.000443	0.00971	0.011721
PSMB6	-0.7895	9.5492	-3.42513	0.00272	0.02891	-1.70122
PSMC5	-0.5276	7.22999	-4.49212	0.000229	0.007272	0.637079
PSMD2	-0.6708	8.47568	-5.13319	5.27e-05	0.003524	2.0355
PTCD2	0.66152	7.33092	4.37805	0.000299	0.008042	0.386016
PTCH2	-0.60855	4.68232	-3.86768	0.000978	0.01568	-0.73769
PTCHD4	0.656191	6.30296	5.59597	1.86e-05	0.002271	3.02297
PTGER2	-0.74291	4.82424	-5.20769	4.45e-05	0.003253	2.19596
PTN	0.804971	6.7041	3.37905	0.003024	0.030736	-1.80028
PTP4A2	-0.53089	10.7573	-5.72057	1.41e-05	0.002046	3.2847
PTPN1	-0.96971	8.74753	-3.91895	0.000868	0.014563	-0.6251
PTPN13	0.628388	6.71189	3.57893	0.001909	0.023325	-1.36852
PTPN20	0.585059	5.90435	3.5358	0.002108	0.0248	-1.46211
PTPRE	-0.71017	7.89289	-3.25027	0.004058	0.036147	-2.07542
PTX3	-1.64568	4.46114	-4.88428	9.29e-05	0.004684	1.49585
PVR	-0.76642	8.36438	-3.66486	0.001565	0.020649	-1.18152
PXDC1	-1.43963	6.94726	-6.12387	5.85e-06	0.001434	4.11824
PXYLP1	-0.8684	6.81413	-4.42015	0.000271	0.007641	0.478723
PYGL	-0.57605	6.52374	-4.77479	0.000119	0.005166	1.25696
R3HDM2	0.803903	8.42202	4.87519	9.49e-05	0.004741	1.47604
RAB15	-1.37025	7.10209	-6.57577	2.23e-06	0.000999	5.02545
RAB30	0.721357	7.12849	4.05226	0.000637	0.012198	-0.33181
RABGAP1L	0.593207	6.80234	3.94212	0.000822	0.014118	-0.57415
RABGGTB	0.555721	7.87351	3.20294	0.00452	0.038532	-2.17582
RAD23A	-0.50163	8.68907	-5.25343	4.01e-05	0.003034	2.29421
RAD54B	0.50574	5.59897	4.46211	0.000246	0.007356	0.571061
RAD9B	-1.53902	4.38778	-3.89365	0.00092	0.015069	-0.68068
RAMP1	-0.55027	8.14213	-3.07114	0.006091	0.046797	-2.4531
RAN	-0.52102	8.30135	-3.29524	0.003663	0.034208	-1.97964
RANBP17	0.690606	5.97444	6.16772	5.32e-06	0.001408	4.20754
RANBP3L	0.762123	5.03406	3.35013	0.003231	0.031853	-1.86231
RANBP6	-0.54956	7.88716	-3.49678	0.002307	0.026082	-1.54658
RANGAP1	-0.66285	7.12951	-4.81343	0.000109	0.005006	1.34135
RARRES1	-0.83909	5.54988	-4.54235	0.000204	0.00683	0.747506
RASL11B	0.677584	7.27353	3.21563	0.004391	0.037792	-2.14894
RBM3	-0.57992	7.7518	-5.86641	1.02e-05	0.001733	3.5886
RBM43	0.660838	5.95497	4.90435	8.87e-05	0.004568	1.53955
RBM4B	0.525041	8.25253	5.45268	2.56e-05	0.002529	2.7197
RBMS3	0.506769	8.55822	3.04842	0.00641	0.048314	-2.50052
RBMY1J	0.981137	4.10609	5.80823	1.16e-05	0.001875	3.46769
RBPMS2	-0.64056	10.5132	-4.52806	0.000211	0.006955	0.716102
RCAN1	-0.64063	7.98058	-5.3962	2.91e-05	0.002654	2.59952
RCC1	-0.60611	5.6742	-3.67642	0.001523	0.020337	-1.1563
RCN1	-0.68088	7.61969	-3.96332	0.000783	0.013721	-0.52755
RDH10	-1.03703	7.16924	-5.13423	5.25e-05	0.003524	2.03773
RDH5	-0.81317	7.05673	-3.75593	0.001267	0.018331	-0.9826
REEP3	-0.56537	7.4733	-3.04542	0.006454	0.048441	-2.50677
RERGL	0.912667	4.83662	6.46819	2.8e-06	0.001055	4.81215
RFTN2	0.902219	7.51854	3.91147	0.000883	0.014685	-0.64152
RFX3	0.514718	5.80084	3.88325	0.000943	0.015289	-0.70351
RFX7	0.59597	7.28636	3.44003	0.002629	0.028224	-1.66911
RGAG1	-1.06954	5.51003	-5.64214	1.68e-05	0.002196	3.12017
RGN	0.809303	6.10814	3.73867	0.001319	0.018809	-1.02035
RGS16	-0.56533	6.30279	-4.81205	0.00011	0.005006	1.33835
RGS5	0.957635	10.893	5.66819	1.59e-05	0.002181	3.17491
RGS6	1.3234	7.07522	5.00722	7.02e-05	0.004085	1.76302
RGS7BP	1.18603	6.79172	5.45453	2.55e-05	0.002529	2.72363
RHOBTB1	0.656067	7.33017	5.27719	3.8e-05	0.00296	2.34516
RHOU	-0.54529	6.85494	-3.0753	0.006034	0.046517	-2.44439
RIC8A	-0.5041	7.5897	-3.65848	0.001588	0.020793	-1.19543
RIMKLB	0.590194	7.10184	3.86188	0.000991	0.015737	-0.75042
RIPK2	-0.51003	7.03212	-3.53234	0.002125	0.02492	-1.46961
RMDN2	0.587674	5.74348	5.25367	4.01e-05	0.003034	2.29472
RNASE2	-0.94464	4.86687	-7.45168	3.72e-07	0.000363	6.69686
RNF122	-1.2138	7.73432	-7.27657	5.28e-07	0.000462	6.37214
RNF141	0.520227	7.55936	3.02858	0.006703	0.049499	-2.54183
RNF145	-0.50598	7.32245	-4.82002	0.000108	0.004983	1.35575
RNF180	0.580453	7.93035	4.43101	0.000264	0.007536	0.502623
RNF185-AS1	-0.59884	4.07526	-4.0331	0.000666	0.012427	-0.37399
RNPC3	0.56351	7.55273	4.8092	0.00011	0.005006	1.33214
RNU105B	0.543868	6.34173	6.49491	2.65e-06	0.001055	4.8653
RNU5D-1	-0.57943	2.98951	-3.24581	0.0041	0.03634	-2.0849
RORA	0.607645	7.77781	5.5489	2.07e-05	0.002349	2.92361
RPL22L1	-0.88509	4.93823	-3.85117	0.001016	0.016032	-0.77392
RPL29	-0.69321	8.82494	-3.76581	0.001238	0.018071	-0.96097
RPL35	-0.76719	9.22592	-3.89073	0.000927	0.01516	-0.68708
RPL39	-0.71498	9.60355	-3.08953	0.005843	0.045575	-2.41462
RPLP0	-0.59376	10.8496	-3.86497	0.000984	0.015711	-0.74364
RPN1	-0.70514	8.86239	-5.31912	3.46e-05	0.002843	2.43494
RPN2	-0.72878	9.01052	-6.10082	6.15e-06	0.001439	4.07119
RPP40	-0.58006	4.88213	-3.62872	0.001701	0.021589	-1.26025
RPRD2	0.65164	8.77066	5.3447	3.27e-05	0.002789	2.48963
RPS12	-0.76954	7.22861	-3.73143	0.001341	0.01896	-1.03618
RPS15	-0.60784	9.39208	-3.21995	0.004348	0.037521	-2.13978
RPS17	-0.65017	10.4826	-3.2245	0.004304	0.037436	-2.13013
RPS2	-0.54105	10.3242	-4.45942	0.000247	0.007357	0.565144
RPS4Y1	1.89884	7.33153	4.49166	0.00023	0.007272	0.636065
RPS5	-0.84941	9.098	-3.56587	0.001967	0.023777	-1.39688
RPS6	-0.55803	10.5437	-4.20824	0.000443	0.00971	0.011847
RPS6KA3	-0.53871	8.66251	-3.12815	0.005355	0.042914	-2.3336
RPS6KA6	0.570728	4.47465	4.41412	0.000275	0.007684	0.465439
RPSA	-0.77703	8.42468	-4.10289	0.000566	0.011397	-0.2203
RRAD	-0.57124	7.28404	-3.67601	0.001525	0.020337	-1.1572
RRAGD	0.520848	9.48926	3.30584	0.003575	0.033762	-1.95703
RRBP1	-0.69758	7.05268	-6.96511	9.94e-07	0.000646	5.78288
RRN3P1	0.509107	8.54854	4.36362	0.000309	0.008238	0.354242
RRP12	-0.78036	7.13813	-4.19486	0.000457	0.009891	-0.01764
RSC1A1	0.580681	7.74073	4.69144	0.000145	0.005663	1.0746
RTN4IP1	0.595603	6.00313	4.30352	0.000355	0.008857	0.221843
RUNX1	-0.60728	7.52219	-3.47827	0.002407	0.026768	-1.5866
RUNX1T1	0.771451	7.96945	5.84534	1.07e-05	0.001785	3.54485
RUSC2	-0.57168	7.8514	-3.57888	0.001909	0.023325	-1.36865
RXRG	1.3809	6.88437	5.33516	3.34e-05	0.002802	2.46925
RYR2	0.631169	11.6695	3.34108	0.003298	0.032196	-1.88168
S100A1	0.660292	9.17919	3.43386	0.002666	0.028558	-1.68241
S100A11	-1.02339	9.34226	-3.54744	0.002053	0.024444	-1.43689
S100A12	-1.22912	4.80993	-4.59245	0.000182	0.006457	0.857545
S100A16	-0.83223	8.10054	-3.696	0.001456	0.01985	-1.11358
S100A3	-0.68687	5.04429	-3.95674	0.000795	0.013812	-0.54202
S100A8	-2.01074	6.36703	-6.25123	4.45e-06	0.001298	4.37688
S100A9	-0.96079	6.20126	-6.64687	1.92e-06	0.000993	5.16547
SAMD12	0.961156	6.06105	3.57244	0.001937	0.023547	-1.38264
SAMD9	0.629969	6.32463	3.52979	0.002138	0.025	-1.47513
SAMD9L	0.9494	7.57558	4.66291	0.000155	0.00593	1.0121
SAMM50	0.632347	9.56195	4.19652	0.000455	0.00988	-0.01398
SAMSN1	-0.51785	3.83428	-3.66985	0.001547	0.020476	-1.17064
SAP30BP	-0.54804	6.83291	-3.82141	0.001089	0.016644	-0.83919
SAT1	-0.75213	9.09639	-3.76749	0.001234	0.018045	-0.9573
SATB1	0.63127	8.47689	4.49815	0.000226	0.00724	0.650334
SCARNA9L	-0.58225	4.10553	-3.25469	0.004018	0.035928	-2.06602
SCD	-1.35011	6.25143	-5.37982	3.02e-05	0.002682	2.56459
SCN2B	0.561756	6.57059	4.35357	0.000316	0.008366	0.332109
SCN3A	0.582075	4.86391	4.11117	0.000555	0.011316	-0.20206
SCN7A	0.771448	8.49332	3.03574	0.006596	0.049107	-2.52694
SCX	-0.56941	6.60606	-3.7613	0.001251	0.018156	-0.97084
SDHC	0.50179	9.84289	3.42866	0.002698	0.028825	-1.6936
SDPR	0.599525	8.10237	3.68091	0.001508	0.020284	-1.14651
SEC13	-0.51117	7.49529	-4.53167	0.000209	0.00692	0.724037
SEC24D	-0.63908	7.24355	-3.11681	0.005494	0.043698	-2.35742
SEC61A1	-0.62659	9.0364	-4.3012	0.000357	0.008864	0.216725
SEC61B	-0.51908	8.98557	-3.59188	0.001852	0.022899	-1.3404
SELE	-1.33536	5.49222	-4.44213	0.000257	0.007432	0.527109
SELPLG	-0.8037	6.84271	-4.08025	0.000597	0.011709	-0.27017
SEMA3D	0.844509	5.68036	3.49375	0.002323	0.026207	-1.55315
SEMA5A	0.950215	9.22443	5.73516	1.37e-05	0.002025	3.31522
SEMA6A	0.681165	6.84888	3.31135	0.00353	0.03354	-1.94525
SEMA6B	-0.50797	6.61351	-4.50593	0.000222	0.007156	0.667454
SEMA6D	0.562334	7.46295	3.3412	0.003297	0.032196	-1.88141
SEPP1	1.12493	9.57883	5.5183	2.21e-05	0.002422	2.85886
SEPSECS	0.660713	6.70865	4.55429	0.000199	0.00676	0.773725
SERPINA1	-0.64339	6.24312	-3.43515	0.002658	0.028489	-1.67962
SERPINA3	-3.06418	6.6225	-7.49426	3.42e-07	0.000363	6.77508
SERPINB8	-1.04585	6.27756	-4.62637	0.000168	0.006198	0.931962
SERPINE1	-3.18506	7.0274	-5.21256	4.4e-05	0.003245	2.20643
SERPINH1	-0.85857	8.1083	-3.51335	0.00222	0.025536	-1.51074
SESN1	0.521334	8.17078	3.70878	0.001413	0.019497	-1.08568
SESN3	1.07243	6.50155	3.98192	0.00075	0.013364	-0.48663
SETMAR	0.502657	7.18125	4.51344	0.000218	0.007079	0.683964
SFRP4	1.8071	5.80298	4.32345	0.000339	0.008604	0.265754
SGCB	0.583345	9.57639	4.00183	0.000716	0.013018	-0.44281
SGCD	0.725693	9.05574	3.41218	0.002802	0.029376	-1.72909
SGIP1	0.759161	7.26882	4.10695	0.000561	0.011347	-0.21135
SGK1	-0.77638	6.42644	-3.7522	0.001278	0.018463	-0.99075
SGMS2	-1.14558	7.69906	-3.95745	0.000794	0.013808	-0.54045
SGPP2	-1.07942	5.97553	-3.595	0.001839	0.022763	-1.33362
SH2D4A	-0.5398	5.77958	-3.17871	0.004776	0.039856	-2.22706
SH3BGR	-1.17661	7.71053	-5.20237	4.5e-05	0.003269	2.18452
SH3BGRL	0.766229	9.55805	4.72308	0.000135	0.005474	1.14389
SH3BGRL3	-0.65008	7.90564	-4.30341	0.000355	0.008857	0.221606
SH3GL1	-0.68176	7.11252	-4.90528	8.86e-05	0.004568	1.54157
SH3GLB1	-0.53329	9.19509	-3.51358	0.002219	0.025536	-1.51025
SH3TC2	0.707502	5.9929	5.27171	3.85e-05	0.00297	2.33342
SHMT2	-0.85812	7.85189	-4.52374	0.000213	0.006987	0.706611
SIGLEC16	-0.58547	5.38355	-3.40246	0.002865	0.029769	-1.74998
SIGLEC9	-0.66937	5.72712	-6.06887	6.59e-06	0.001491	4.00585
SIK1	-0.85338	7.24829	-4.08124	0.000595	0.011709	-0.26798
SIRT5	0.634047	7.86789	3.94222	0.000822	0.014118	-0.57395
SLA	-1.02574	5.60846	-5.38602	2.98e-05	0.002675	2.57782
SLC11A1	-0.94737	5.35057	-5.12211	5.4e-05	0.003543	2.01159
SLC16A10	-0.56095	6.40861	-3.15048	0.005091	0.041509	-2.28661
SLC16A12	0.731831	6.94801	3.8258	0.001077	0.016533	-0.82955
SLC16A4	0.766569	6.06395	3.81625	0.001102	0.01677	-0.8505
SLC16A7	0.801798	10.0272	3.34498	0.003269	0.03205	-1.87332
SLC16A9	0.870085	5.07578	4.98084	7.45e-05	0.004205	1.70579
SLC19A2	-1.11186	7.51295	-3.28146	0.00378	0.034725	-2.00902
SLC1A4	-0.56793	6.78828	-3.69358	0.001464	0.019921	-1.11887
SLC1A5	-0.88864	6.35275	-5.98087	7.98e-06	0.001656	3.82516
SLC20A1	-0.57873	7.12608	-3.13487	0.005274	0.042526	-2.31946
SLC22A5	-0.9524	7.45216	-3.95723	0.000794	0.013808	-0.54093
SLC25A20	0.821572	8.09057	4.76875	0.000121	0.005179	1.24376
SLC25A25	-0.57262	5.33364	-3.2806	0.003787	0.03473	-2.01085
SLC25A26	0.517365	7.6004	3.29416	0.003672	0.034249	-1.98196
SLC25A27	0.819424	7.42563	3.84185	0.001038	0.016231	-0.79438
SLC25A30	1.1742	8.30839	4.844	0.000102	0.004898	1.40805
SLC25A4	0.507426	11.8814	3.15781	0.005007	0.041004	-2.27116
SLC25A40	0.743737	8.43534	5.08572	5.87e-05	0.003675	1.93299
SLC25A44	-0.50488	7.02518	-3.75558	0.001268	0.018333	-0.98336
SLC27A4	-0.59528	7.24739	-5.18921	4.64e-05	0.003272	2.15621
SLC2A1	-0.92738	8.66547	-5.88129	9.91e-06	0.001706	3.61944
SLC2A3	-0.96859	7.32832	-4.76124	0.000123	0.005221	1.22734
SLC35A2	-0.50848	6.3691	-5.87751	1e-05	0.001706	3.6116
SLC35C1	-0.55215	6.4738	-4.126	0.000536	0.011021	-0.16937
SLC36A4	-0.76495	6.23161	-3.81719	0.001099	0.01677	-0.84843
SLC38A3	1.08172	7.03547	4.91832	8.6e-05	0.004519	1.56994
SLC38A5	-0.88852	5.2864	-4.48229	0.000235	0.007282	0.615449
SLC38A6	0.590998	6.51259	4.47782	0.000237	0.007299	0.605621
SLC39A1	-0.63635	7.3026	-5.07519	6.01e-05	0.003704	1.91021
SLC39A14	-0.51927	9.27621	-3.43273	0.002673	0.028602	-1.68483
SLC39A7	-0.61869	7.29711	-5.12582	5.36e-05	0.003534	2.01959
SLC3A2	-0.57103	7.43751	-3.41016	0.002815	0.029442	-1.73342
SLC40A1	1.20178	8.43062	5.49738	2.32e-05	0.002463	2.81456
SLC44A5	0.858868	5.30479	3.23122	0.004238	0.037018	-2.11587
SLC50A1	-0.51555	7.06569	-3.19087	0.004646	0.039193	-2.20136
SLC52A2	-0.53233	6.51447	-5.04214	6.48e-05	0.003861	1.83868
SLC5A6	-0.69575	6.20653	-3.63176	0.001689	0.021565	-1.25364
SLC6A1	0.921226	6.46151	4.84946	0.000101	0.004895	1.41997
SLC7A1	-1.66294	7.45525	-4.7826	0.000117	0.00512	1.27403
SLC7A2	-0.72788	8.22363	-3.65369	0.001606	0.020915	-1.20586
SLC7A5	-0.95255	6.47956	-4.0388	0.000657	0.012351	-0.36144
SLC9B1	1.02105	4.8257	7.86203	1.67e-07	0.00028	7.43913
SLCO2A1	-0.99542	7.44164	-3.48936	0.002347	0.026355	-1.56264
SLCO4A1	-0.8828	6.20567	-3.93115	0.000844	0.014276	-0.59828
SLCO4C1	0.528067	4.52184	4.30072	0.000357	0.008864	0.215657
SLFN12	0.506498	5.13112	3.73041	0.001344	0.018985	-1.03841
SLFN13	0.515723	6.01296	4.37744	0.000299	0.008042	0.384688
SLIT3	0.764422	7.49689	3.29269	0.003684	0.034332	-1.98509
SLITRK6	1.31831	4.92746	6.01932	7.34e-06	0.001572	3.90423
SLN	2.20352	7.69493	4.64061	0.000163	0.006146	0.963199
SLX4IP	0.562892	6.62294	5.32667	3.4e-05	0.002818	2.45109
SMAD1	0.586033	7.55002	3.90951	0.000887	0.014718	-0.64583
SMARCA2	0.532081	8.01741	3.87827	0.000954	0.015392	-0.71443
SMC6	0.556272	6.87481	3.06066	0.006236	0.047445	-2.475
SMCO1	1.58314	8.33586	3.93569	0.000835	0.014222	-0.5883
SMIM8	0.954958	6.95744	5.32066	3.45e-05	0.002843	2.43824
SMOC2	1.13763	7.72651	5.19084	4.62e-05	0.003272	2.15971
SMPDL3A	-0.67031	5.8104	-4.43116	0.000264	0.007536	0.502952
SNAP91	1.1185	6.23868	3.04153	0.006511	0.048722	-2.51487
SNCA	0.943302	7.81412	4.69464	0.000144	0.00565	1.08162
SNORA36C	0.71487	5.29718	3.29558	0.00366	0.034201	-1.97892
SNORA40	-1.2979	5.04566	-5.04843	6.39e-05	0.003861	1.85231
SNORA41	-0.62308	4.9112	-3.42469	0.002723	0.028912	-1.70215
SNORD1A	-0.53756	3.17858	-4.64033	0.000163	0.006146	0.962586
SNORD38A	-0.66322	4.40911	-4.1994	0.000452	0.009824	-0.00764
SNORD44	-0.66386	5.8018	-3.27568	0.00383	0.034947	-2.02135
SNORD4A	-0.66518	5.34055	-3.18821	0.004674	0.039281	-2.20697
SNORD76	-0.83314	6.20655	-3.09611	0.005757	0.045149	-2.40084
SNRPB	-0.92957	8.23518	-4.59581	0.00018	0.006441	0.864909
SNRPC	-0.51461	7.65683	-3.17096	0.00486	0.040262	-2.24342
SNRPD1	-0.66767	5.68849	-3.34913	0.003238	0.031871	-1.86444
SOCS3	-1.33358	6.02743	-5.89013	9.72e-06	0.001706	3.63776
SORBS1	0.537556	11.1836	3.34783	0.003248	0.031919	-1.86722
SOX6	0.659605	6.90594	6.4436	2.95e-06	0.001057	4.76318
SPATA6	0.538054	7.42123	3.68027	0.00151	0.020284	-1.14791
SPCS3	-0.84419	8.38593	-3.92958	0.000847	0.014305	-0.60173
SPDYE7P	0.593034	6.41336	3.24704	0.004088	0.036289	-2.08227
SPHK1	-0.78861	5.61753	-4.19533	0.000457	0.009891	-0.0166
SPHKAP	1.31374	10.3363	5.02999	6.66e-05	0.003922	1.81238
SPIN1	0.559093	9.51625	4.09521	0.000576	0.011492	-0.23721
SPINK1	-0.68643	4.32299	-3.63371	0.001682	0.021517	-1.24939
SPOCK1	1.04681	8.33657	4.08746	0.000587	0.011621	-0.25429
SPP1	-2.17764	7.1297	-4.27983	0.000375	0.009048	0.169638
SPTLC3	0.905997	6.85556	4.13711	0.000523	0.010818	-0.14491
SPX	0.850789	6.30968	3.90656	0.000893	0.014732	-0.65232
SREBF1	-0.52827	6.55222	-3.83917	0.001045	0.016306	-0.80023
SRF	-0.61334	8.80398	-4.61318	0.000173	0.006301	0.903037
SRM	-0.70087	9.09165	-4.72665	0.000133	0.005461	1.15169
SRPX	-0.65471	9.29576	-4.6322	0.000166	0.006164	0.944753
SSPN	0.717573	9.26323	4.5551	0.000198	0.00676	0.77551
SSR3	-1.11797	8.66817	-5.67418	1.56e-05	0.002181	3.18748
ST8SIA6	0.819777	6.85243	5.07351	6.03e-05	0.003704	1.90657
STAB1	-0.66123	7.41039	-5.46976	2.47e-05	0.002509	2.75596
STAMBPL1	0.74283	6.14594	4.50503	0.000223	0.007156	0.665463
STAT3	-0.65542	10.0993	-4.15181	0.000505	0.010666	-0.11252
STIP1	-0.73118	7.91713	-3.71878	0.001381	0.01926	-1.06382
STK33	0.562687	6.9384	4.02899	0.000672	0.012469	-0.38304
STX4	-0.53969	6.98714	-5.10395	5.63e-05	0.00361	1.97237
STXBP6	-0.85947	6.44268	-3.89652	0.000914	0.015018	-0.67436
SUCLA2	0.585726	9.63222	3.56065	0.001991	0.023965	-1.40823
SULT1C2	0.544132	4.59518	3.17728	0.004791	0.039902	-2.23008
SULT1C4	1.11642	5.85505	4.92293	8.5e-05	0.004496	1.57997
SUMO1	0.577988	8.81405	4.80396	0.000112	0.005033	1.32068
SUN2	-0.59764	7.97157	-6.11259	5.99e-06	0.001434	4.09522
SURF4	-0.71994	8.73209	-5.3963	2.91e-05	0.002654	2.59972
SVEP1	1.32119	7.17295	6.00761	7.53e-06	0.001579	3.88016
SVIL	0.631451	10.2712	3.97404	0.000764	0.013505	-0.50397
SVIP	0.695429	7.33517	7.06469	8.11e-07	0.000628	5.9729
SZRD1	-0.50753	8.43403	-5.27752	3.8e-05	0.00296	2.34587
TAAR3	0.548963	4.16095	3.51003	0.002237	0.025645	-1.51793
TANGO2	0.578836	8.05192	4.84265	0.000102	0.004901	1.40513
TAS2R19	0.624704	5.635	4.03226	0.000667	0.012427	-0.37584
TAS2R4	0.966738	5.85632	5.06942	6.09e-05	0.003704	1.89773
TAS2R50	0.569565	5.61913	3.11233	0.00555	0.044004	-2.36682
TAX1BP3	0.560171	9.08544	4.25407	0.000398	0.009251	0.112861
TBCK	0.653049	8.13847	6.68345	1.78e-06	0.000944	5.23721
TBX5	1.24655	8.8517	4.65695	0.000157	0.005965	0.999037
TCF4	0.647636	9.37461	4.77129	0.00012	0.005166	1.24931
TCP11L2	0.928627	8.83555	3.5402	0.002087	0.02472	-1.45258
TEAD4	-0.83877	6.93945	-5.91576	9.19e-06	0.001683	3.69081
TENM3	0.628518	6.32607	4.69025	0.000145	0.005663	1.07201
TERC	-0.81614	6.69713	-3.07631	0.00602	0.046433	-2.44229
TES	-1.01721	8.26599	-3.08638	0.005885	0.045776	-2.42122
TESK1	-0.54352	8.6409	-4.47045	0.000241	0.007326	0.589404
TET1	0.690543	5.73818	4.63286	0.000166	0.006164	0.946206
TET3	-0.50397	6.08917	-3.76164	0.00125	0.018156	-0.9701
TFDP2	0.806319	8.6866	5.51244	2.24e-05	0.002427	2.84647
TFE3	-0.64696	7.67179	-4.06986	0.000611	0.011925	-0.29305
TFRC	-1.32555	8.18484	-5.88222	9.89e-06	0.001706	3.62137
TGFBI	-0.55923	7.75582	-3.1729	0.004839	0.040151	-2.23933
THBS1	-1.22161	10.229	-3.8859	0.000937	0.015261	-0.6977
THEMIS2	-0.73728	6.43353	-3.36807	0.003101	0.031158	-1.82385
THNSL1	0.625179	5.88427	3.28877	0.003717	0.034392	-1.99343
THOC6	-0.61478	7.61468	-5.1787	4.75e-05	0.003321	2.13359
THSD7A	0.508725	5.9428	3.06938	0.006115	0.04682	-2.45678
TIAM2	-0.57514	5.7754	-4.22713	0.000424	0.009485	0.053498
TIMM17A	-0.79044	7.74693	-6.04877	6.88e-06	0.001514	3.96466
TIMMDC1	0.665756	10.3173	4.44554	0.000255	0.007432	0.534604
TIMP1	-1.16024	10.7971	-3.33495	0.003345	0.032386	-1.89479
TIPARP	-0.6437	7.89053	-3.48999	0.002343	0.026346	-1.56127
TKT	-0.77672	7.27796	-7.40179	4.11e-07	0.000376	6.60483
TLR2	-0.55799	5.64624	-4.48657	0.000232	0.007272	0.624873
TLR3	0.715907	6.96586	5.40162	2.87e-05	0.002654	2.61107
TM6SF1	0.538245	6.10414	3.04067	0.006523	0.048749	-2.51667
TM7SF2	0.894533	7.23975	4.72495	0.000134	0.005461	1.14797
TMBIM1	-0.64033	10.1358	-7.54389	3.1e-07	0.000363	6.86593
TMED9	-0.73055	7.45545	-3.90001	0.000907	0.014933	-0.66669
TMEM104	-0.63079	6.89521	-4.05098	0.000639	0.012219	-0.33464
TMEM106B	0.540961	8.59286	3.85648	0.001003	0.015886	-0.76226
TMEM116	0.62039	9.05554	3.22394	0.004309	0.037436	-2.13131
TMEM135	0.722817	7.55553	5.1992	4.53e-05	0.003269	2.17769
TMEM140	1.18716	7.47706	8.2171	8.47e-08	0.00028	8.06042
TMEM159	0.92307	7.95197	4.47522	0.000238	0.00731	0.599904
TMEM165	-0.54574	8.53367	-4.15168	0.000505	0.010666	-0.11278
TMEM182	1.51393	10.0058	4.5696	0.000192	0.00665	0.807358
TMEM232	0.614117	5.73749	3.51246	0.002225	0.025564	-1.51267
TMEM254	0.687176	7.57068	5.48333	2.39e-05	0.002471	2.78477
TMEM43	-0.7077	8.88234	-4.14707	0.000511	0.010702	-0.12294
TMEM55A	0.886041	7.8987	6.03353	7.11e-06	0.00154	3.9334
TMEM71	0.9435	8.15536	3.23213	0.00423	0.037018	-2.11394
TMEM8A	-0.54171	7.74872	-4.80197	0.000112	0.005045	1.31635
TMUB1	-0.58086	7.37395	-3.37034	0.003085	0.031136	-1.81898
TNC	-2.16151	7.40626	-3.52148	0.002179	0.025308	-1.49313
TNFAIP6	-1.32099	6.80956	-3.29116	0.003697	0.034356	-1.98835
TNFAIP8L3	-0.75083	6.04582	-4.32317	0.000339	0.008604	0.265139
TNFRSF12A	-1.61312	9.045	-6.37357	3.42e-06	0.001156	4.62317
TNFRSF1A	-0.87841	8.10693	-6.48535	2.7e-06	0.001055	4.84629
TNFSF10	0.948028	9.50241	4.03569	0.000662	0.012406	-0.36829
TNKS	0.55808	7.91556	5.59492	1.87e-05	0.002271	3.02076
TOB1	0.743208	8.94815	5.5493	2.06e-05	0.002349	2.92445
TP53INP1	0.892877	7.67815	5.89683	9.58e-06	0.001706	3.65163
TPCN1	1.21622	9.07628	4.59654	0.00018	0.006441	0.866521
TPD52L1	0.562721	8.14986	4.30386	0.000355	0.008857	0.222579
TPT1-AS1	0.553621	7.24044	3.90796	0.00089	0.014718	-0.64923
TPTEP1	0.538407	5.36285	3.53597	0.002108	0.0248	-1.46175
TRAK1	0.546392	8.95722	4.54985	0.000201	0.006769	0.763968
TRAK2	0.894907	10.0015	5.53007	2.16e-05	0.002372	2.88378
TREM1	-0.78367	5.01249	-6.38073	3.37e-06	0.001156	4.63751
TRIB1	-1.32369	7.76879	-5.11729	5.46e-05	0.00357	2.00117
TRIM22	0.777068	7.37315	3.33903	0.003314	0.032291	-1.88606
TRIM45	0.655594	6.59378	4.16308	0.000492	0.010472	-0.08767
TRIM49C	0.763142	4.62689	3.7837	0.001188	0.017621	-0.92182
TRIM51	0.635969	5.12845	4.23198	0.000419	0.009466	0.064172
TRIM55	-1.22821	8.00168	-3.85749	0.001001	0.015861	-0.76005
TRIM64B	0.69816	5.13067	3.23129	0.004238	0.037018	-2.11573
TRIO	-0.68969	8.17007	-3.50502	0.002263	0.025835	-1.52877
TRPC1	0.768659	7.57104	5.64313	1.68e-05	0.002196	3.12226
TSPAN1	-0.52671	5.31224	-4.2588	0.000394	0.009182	0.123287
TSPAN12	0.527301	8.37963	3.32598	0.003414	0.032804	-1.914
TSPAN6	0.619621	6.64437	4.48558	0.000233	0.007272	0.622697
TSPAN7	1.16573	9.08945	8.19687	8.8e-08	0.00028	8.02554
TTC3	0.521535	8.2262	4.23776	0.000414	0.009424	0.076909
TTLL1	0.53064	7.41769	3.36101	0.003151	0.031399	-1.83898
TTLL3	0.529196	6.88373	3.19303	0.004623	0.039066	-2.19679
TTLL7	1.1943	6.66299	4.10023	0.000569	0.011423	-0.22616
TTTY10	1.51842	6.39279	5.47438	2.44e-05	0.002508	2.76578
TTTY14	0.783902	6.35893	3.68894	0.00148	0.020055	-1.129
TTYH3	-0.8039	6.77763	-7.95178	1.4e-07	0.00028	7.59801
TUBA1B	-0.72465	9.36449	-5.90767	9.36e-06	0.001683	3.67407
TUBA1C	-1.63264	7.93044	-5.44815	2.59e-05	0.002543	2.71007
TUBA3D	-0.99488	7.44644	-5.85699	1.05e-05	0.001755	3.56904
TUBA3E	-0.60338	5.3366	-4.82715	0.000106	0.004972	1.37129
TUBA4A	-1.02993	9.88284	-6.437	2.99e-06	0.001057	4.75001
TUBA4B	-0.54914	6.0424	-4.30317	0.000355	0.008857	0.221067
TUBB	-0.72972	11.7038	-6.72036	1.65e-06	0.000922	5.3094
TUBB4B	-0.91924	11.5935	-6.996	9.33e-07	0.000646	5.84197
TUBB6	-1.07841	8.58549	-6.50464	2.59e-06	0.001055	4.88462
TUBE1	0.52048	6.57922	3.25562	0.004009	0.035896	-2.06403
TUBG1	-0.52284	9.79098	-4.03972	0.000655	0.012351	-0.35942
TXLNB	1.23812	10.2156	4.10972	0.000557	0.011328	-0.20526
TXLNGY	1.43311	6.03925	5.1554	5.01e-05	0.003419	2.08339
TXNL4A	-0.50072	8.48072	-3.18931	0.004662	0.039265	-2.20464
TYROBP	-0.73671	8.7053	-3.02637	0.006736	0.049672	-2.54643
UACA	0.73087	7.3562	3.18307	0.004729	0.039583	-2.21785
UAP1	-0.50109	7.53702	-3.39698	0.002902	0.029951	-1.76177
UBASH3B	-1.366	5.45003	-4.65997	0.000156	0.005946	1.00565
UBE2Q2P1	0.580168	7.9582	3.88911	0.00093	0.015204	-0.69063
UCK2	-0.95552	7.52952	-4.59102	0.000182	0.006457	0.85439
UFSP2	0.663494	7.51344	3.71226	0.001402	0.019419	-1.07808
UG0898H09	0.504857	5.75005	3.78386	0.001188	0.017621	-0.92145
UGCG	-1.1517	6.70847	-3.33543	0.003341	0.032386	-1.89376
UGP2	-0.78996	9.00155	-4.35111	0.000318	0.008392	0.326685
UGT2A3	0.521419	3.80491	3.98759	0.00074	0.013245	-0.47416
UGT2B11	0.963402	6.32611	3.12384	0.005408	0.043231	-2.34266
UGT2B28	0.547359	2.72452	3.67726	0.00152	0.020331	-1.15447
ULBP3	-0.54114	5.71182	-3.47571	0.002421	0.026854	-1.59212
URB2	-0.57425	5.93331	-3.44859	0.002577	0.02786	-1.65066
USP12	-1.47554	5.3668	-4.83632	0.000104	0.00492	1.39131
USP13	0.520654	9.37199	3.50042	0.002288	0.025997	-1.53872
USP17L15	1.21262	6.82515	4.20012	0.000451	0.009818	-0.00604
USP38	-0.67091	7.74353	-3.94063	0.000825	0.014137	-0.57743
USP9Y	2.06888	7.34976	4.71765	0.000136	0.005499	1.13199
UTY	2.22399	7.21521	5.00569	7.04e-05	0.004085	1.7597
VARS	-0.78971	7.18587	-5.40924	2.82e-05	0.002645	2.62729
VDAC3	0.576779	11.2594	4.17558	0.000478	0.010251	-0.06012
VDR	-0.55837	5.17676	-4.46974	0.000242	0.007326	0.587847
VIMP	-0.77738	6.83347	-5.53765	2.12e-05	0.002349	2.89982
VPS13A	0.531498	7.5956	3.64778	0.001628	0.021122	-1.21875
VPS45	0.540727	9.47207	4.28152	0.000374	0.009023	0.173363
VSIG4	-1.12553	7.65365	-4.55406	0.000199	0.00676	0.773224
VSTM4	0.530147	8.18481	3.6339	0.001681	0.021517	-1.24898
VWA8	0.643258	8.86912	4.89486	9.07e-05	0.004635	1.51888
WDR1	-0.70667	9.56471	-5.663	1.6e-05	0.002181	3.16401
WDR13	-0.59222	7.43102	-4.58038	0.000187	0.006595	0.831026
WDR46	-0.63263	6.44314	-4.33636	0.000329	0.00856	0.294196
WDR48	0.566644	7.06298	4.53613	0.000207	0.006887	0.733836
WDR49	0.694969	5.14404	5.9583	8.38e-06	0.001666	3.77864
WFS1	0.704406	8.09017	3.23151	0.004236	0.037018	-2.11525
WWC1	-0.82738	5.71739	-4.25193	0.0004	0.009265	0.108147
XAF1	0.809529	8.51823	3.5992	0.001821	0.022599	-1.32449
XIRP1	-1.25338	9.93639	-4.18524	0.000467	0.010098	-0.03884
XIRP2	-0.8104	10.743	-3.16761	0.004897	0.040473	-2.2505
XRCC4	-1.7462	6.68891	-4.07673	0.000601	0.011776	-0.27792
XYLT1	-0.70429	6.99918	-3.54469	0.002066	0.024526	-1.44285
YIF1A	-0.52992	7.92988	-3.80978	0.001118	0.016984	-0.86468
YKT6	-0.62141	8.04959	-3.54535	0.002062	0.024503	-1.44141
YPEL1	0.81369	6.83507	5.92284	9.05e-06	0.001683	3.70543
YPEL2	0.510747	8.15598	3.2509	0.004053	0.036123	-2.07407
YRDC	-0.64019	6.25166	-4.07411	0.000605	0.011819	-0.28368
YWHAH	-0.61625	8.51103	-4.40981	0.000277	0.007716	0.455968
ZBED4	-0.60038	6.0145	-4.80982	0.00011	0.005006	1.33349
ZBED8	0.747807	5.06307	4.43735	0.00026	0.007458	0.516583
ZBTB20	0.671354	9.15772	6.93319	1.06e-06	0.000668	5.72163
ZBTB25	0.526728	6.5458	3.29637	0.003653	0.034164	-1.97724
ZC3H6	0.76752	8.04955	4.2647	0.000389	0.009176	0.136294
ZDHHC15	0.871938	6.08392	5.67649	1.56e-05	0.002181	3.19232
ZDHHC16	-0.73325	8.13256	-4.68511	0.000147	0.005709	1.06074
ZDHHC9	-0.8116	8.30176	-3.99293	0.000731	0.01314	-0.4624
ZFP36	-1.04702	7.25266	-3.83845	0.001046	0.016318	-0.80182
ZFP37	0.525009	5.1163	4.28633	0.00037	0.008971	0.183949
ZFY	0.900239	6.0793	4.22253	0.000429	0.009536	0.043358
ZMAT1	1.2013	6.84044	4.91195	8.72e-05	0.004568	1.55608
ZNF160	0.614328	7.61535	3.79591	0.001155	0.01733	-0.89506
ZNF177	0.896358	6.27399	5.43533	2.66e-05	0.002579	2.68282
ZNF204P	0.828987	5.90884	4.26129	0.000392	0.009176	0.128768
ZNF214	0.528155	4.61408	3.78241	0.001192	0.017645	-0.92464
ZNF233	0.615667	5.78588	4.41897	0.000272	0.007651	0.476126
ZNF248	0.53332	6.50845	3.08388	0.005918	0.045981	-2.42645
ZNF25	0.713824	7.66758	5.22386	4.29e-05	0.003187	2.2307
ZNF253	0.620813	6.91336	5.5528	2.05e-05	0.002349	2.93185
ZNF280D	0.543769	8.18741	4.90714	8.82e-05	0.004568	1.54562
ZNF283	0.521491	5.93435	3.35079	0.003226	0.031844	-1.86088
ZNF33B	0.536577	5.99264	3.28981	0.003708	0.034383	-1.99122
ZNF404	0.781507	5.40645	3.6293	0.001699	0.021589	-1.259
ZNF415	0.704904	7.26276	5.60539	1.82e-05	0.002271	3.04281
ZNF429	0.713158	6.01361	4.92444	8.48e-05	0.004496	1.58325
ZNF479	0.500218	4.33377	4.45428	0.00025	0.007392	0.553844
ZNF483	0.760651	5.98461	4.29182	0.000365	0.008917	0.196059
ZNF493	0.780463	6.0285	4.14776	0.00051	0.010696	-0.12142
ZNF518A	0.673023	6.79531	4.71133	0.000138	0.005535	1.11816
ZNF528	0.588713	7.01468	4.06273	0.000621	0.012031	-0.30876
ZNF542P	-0.67989	6.94266	-3.16972	0.004874	0.040326	-2.24604
ZNF610	0.907496	6.09459	6.97038	9.83e-07	0.000646	5.79296
ZNF622	-0.62625	6.53368	-3.3873	0.002967	0.030397	-1.78256
ZNF626	0.504207	8.82609	4.40398	0.000281	0.007749	0.44312
ZNF630	0.57236	5.81537	4.8837	9.3e-05	0.004684	1.49457
ZNF658	0.630592	6.08258	5.58804	1.89e-05	0.002271	3.00624
ZNF676	0.809301	7.79715	5.72292	1.4e-05	0.002046	3.28961
ZNF680	0.599207	7.55079	5.28945	3.7e-05	0.002932	2.37144
ZNF704	0.665036	7.81731	5.95511	8.44e-06	0.001666	3.77206
ZNF717	0.768132	8.00945	4.9708	7.62e-05	0.004264	1.68399
ZNF730	0.532604	5.04487	3.24252	0.004131	0.036459	-2.09188
ZNF737	0.898292	8.09982	5.77956	1.24e-05	0.001981	3.40793
ZNF763	0.636654	4.86934	4.59168	0.000182	0.006457	0.855841
ZNF780B	0.633654	7.55391	4.50585	0.000222	0.007156	0.667264
ZNF808	0.530801	8.81554	4.6399	0.000163	0.006146	0.961656
ZNF827	0.540767	8.09042	4.14364	0.000515	0.010739	-0.13051
ZNF844	1.0936	6.2226	7.44285	3.79e-07	0.000363	6.68058
ZNF91	0.564896	9.5402	3.86208	0.00099	0.015737	-0.74997
ZNRD1ASP	0.589362	4.47761	3.18182	0.004742	0.039641	-2.22048
ZPR1	-0.96954	6.96888	-4.22352	0.000428	0.009525	0.045528
ZYX	-1.08512	8.71496	-5.91769	9.16e-06	0.001683	3.6948
